# Supplementary material for: Identification of SARS-CoV2 Main Protease Coldspots Suitable for Drug Targeting
Source: Research Square preprint supplement (doi:10.21203/rs.3.rs-123804/v1), 2020-12-17
Supplement: Supplementary file 1 [file 67d4067930707e140b3e2b9e.docx]

| Accession | Protein | Strain | WildtypeAA | Position | MutatedAA | Frequency | Date_of_collection(YYYYMMDD) |
| --- | --- | --- | --- | --- | --- | --- | --- |
| EPI_ISL_515304 | NSP5 | hCoV-19/USA/NV-NSPHL-A0017/2020 | S | 1 | G | 14 | 20200315 |
| EPI_ISL_511761 | NSP5 | hCoV-19/Portugal/PT1218/2020 | S | 1 | N | 1 | 20200328 |
| EPI_ISL_471418 | NSP5 | hCoV-19/Romania/Focsani-268927/2020 | F | 3 | L | 1 | 20200409 |
| EPI_ISL_451351 | NSP5 | hCoV-19/Sichuan/SC-PHCC1-030/2020 | K | 5 | S | 1 | 20200127 |
| EPI_ISL_451351 | NSP5 | hCoV-19/Sichuan/SC-PHCC1-030/2020 | M | 6 | L | 7 | 20200127 |
| EPI_ISL_426880 | NSP5 | hCoV-19/Australia/VIC909/2020 | M | 6 | N | 1 | 20200323 |
| EPI_ISL_530009 | NSP5 | hCoV-19/Spain/MD-H12-80/2020 | M | 6 | I | 4 | 20200416 |
| EPI_ISL_450517 | NSP5 | hCoV-19/Lebanon/S11_765/2020 | A | 7 | V | 9 | 20200309 |
| EPI_ISL_420423 | NSP5 | hCoV-19/Belgium/PJM-0325166/2020 | A | 7 | T | 9 | 20200325 |
| EPI_ISL_426880 | NSP5 | hCoV-19/Australia/VIC909/2020 | A | 7 | G | 1 | 20200323 |
| EPI_ISL_465845 | NSP5 | hCoV-19/England/201390448/2020 | A | 7 | S | 1 | 20200327 |
| EPI_ISL_511649 | NSP5 | hCoV-19/Portugal/PT1102/2020 | F | 8 | L | 24 | 20200327 |
| EPI_ISL_426880 | NSP5 | hCoV-19/Australia/VIC909/2020 | F | 8 | I | 1 | 20200323 |
| EPI_ISL_507007 | NSP5 | hCoV-19/Iran/IRVSH-01/2020 | P | 9 | L | 1 | 20200501 |
| EPI_ISL_426880 | NSP5 | hCoV-19/Australia/VIC909/2020 | S | 10 | I | 1 | 20200323 |
| EPI_ISL_457519 | NSP5 | hCoV-19/England/NORW-EBEC5/2020 | G | 11 | A | 1 | 20200507 |
| EPI_ISL_576115 | NSP5 | hCoV-19/Indonesia/YO-UGM-10003/2020 | K | 12 | R | 3 | 20200816 |
| EPI_ISL_457519 | NSP5 | hCoV-19/England/NORW-EBEC5/2020 | K | 12 | P | 1 | 20200507 |
| EPI_ISL_429663 | NSP5 | hCoV-19/Croatia/8U-S17/2020 | V | 13 | I | 4 | 20200300 |
| EPI_ISL_453454 | NSP5 | hCoV-19/England/LIVE-9F3D0/2020 | V | 13 | A | 1 | 20200501 |
| EPI_ISL_457519 | NSP5 | hCoV-19/England/NORW-EBEC5/2020 | V | 13 | L | 1 | 20200507 |
| EPI_ISL_547877 | NSP5 | hCoV-19/India/TG-NIV-906/2020 | V | 13 | G | 1 | 20200000 |
| EPI_ISL_457519 | NSP5 | hCoV-19/England/NORW-EBEC5/2020 | E | 14 | K | 1 | 20200507 |
| EPI_ISL_579330 | NSP5 | hCoV-19/New Zealand/20VR2669/2020 | G | 15 | S | 6241 | 20200000 |
| EPI_ISL_462209 | NSP5 | hCoV-19/Belgium/DC-0322355/2020 | G | 15 | D | 5 | 20200322 |
| EPI_ISL_457519 | NSP5 | hCoV-19/England/NORW-EBEC5/2020 | G | 15 | T | 1 | 20200507 |
| EPI_ISL_462808 | NSP5 | hCoV-19/Canada/BC_21350918/2020 | M | 17 | I | 15 | 20200300 |
| EPI_ISL_434875 | NSP5 | hCoV-19/USA/TX-HMH0200/2020 | M | 17 | T | 7 | 20200324 |
| EPI_ISL_546378 | NSP5 | hCoV-19/USA/TX-HMH-6950/2020 | M | 17 | V | 1 | 20200628 |
| EPI_ISL_457519 | NSP5 | hCoV-19/England/NORW-EBEC5/2020 | M | 17 | L | 1 | 20200507 |
| EPI_ISL_508634 | NSP5 | hCoV-19/Spain/CT-IBV-005583/2020 | V | 18 | I | 1 | 20200317 |
| EPI_ISL_542495 | NSP5 | hCoV-19/USA/TX-HMH-1016/2020 | V | 18 | L | 2 | 20200405 |
| EPI_ISL_457519 | NSP5 | hCoV-19/England/NORW-EBEC5/2020 | V | 18 | T | 1 | 20200507 |
| EPI_ISL_457519 | NSP5 | hCoV-19/England/NORW-EBEC5/2020 | Q | 19 | L | 1 | 20200507 |
| EPI_ISL_430156 | NSP5 | hCoV-19/USA/WA-S302/2020 | V | 20 | L | 4 | 20200304 |
| EPI_ISL_577670 | NSP5 | hCoV-19/India/MH-NIV-210934/2020 | V | 20 | A | 1 | 20200914 |
| EPI_ISL_457519 | NSP5 | hCoV-19/England/NORW-EBEC5/2020 | V | 20 | I | 1 | 20200507 |
| EPI_ISL_457820 | NSP5 | hCoV-19/USA/MD-HP00132/2020 | T | 21 | I | 42 | 20200316 |
| EPI_ISL_593725 | NSP5 | hCoV-19/Australia/NSW1110/2020 | T | 21 | A | 2 | 20200829 |
| EPI_ISL_457519 | NSP5 | hCoV-19/England/NORW-EBEC5/2020 | T | 21 | M | 1 | 20200507 |
| EPI_ISL_521513 | NSP5 | hCoV-19/Australia/VIC2671/2020 | C | 22 | F | 1 | 20200702 |
| EPI_ISL_463537 | NSP5 | hCoV-19/USA/WA-S1047/2020 | C | 22 | R | 1 | 20200503 |
| EPI_ISL_513901 | NSP5 | hCoV-19/USA/CA-CZB-2526/2020 | G | 23 | S | 9 | 20200429 |
| EPI_ISL_464535 | NSP5 | hCoV-19/England/20109008704/2020 | G | 23 | V | 1 | 20200305 |
| EPI_ISL_476977 | NSP5 | hCoV-19/Belgium/rega-0411467/2020 | T | 24 | I | 3 | 20200411 |
| EPI_ISL_511195 | NSP5 | hCoV-19/Portugal/PT1234/2020 | T | 24 | A | 6 | 20200331 |
| EPI_ISL_532373 | NSP5 | hCoV-19/England/QEUH-95ED9A/2020 | T | 25 | A | 2 | 20200806 |
| EPI_ISL_455233 | NSP5 | hCoV-19/Netherlands/NA_431/2020 | T | 25 | I | 3 | 20200406 |
| EPI_ISL_555095 | NSP5 | hCoV-19/England/ALDP-95C093/2020 | T | 26 | A | 1 | 20200612 |
| EPI_ISL_515620 | NSP5 | hCoV-19/South Africa/KRISP-K002223/2020 | N | 28 | K | 1 | 20200721 |
| EPI_ISL_408483 | NSP5 | hCoV-19/Shanghai/IVDC-SH-001/2020 | G | 29 | R | 1 | 20200120 |
| EPI_ISL_582096 | NSP5 | hCoV-19/Spain/CB-IBV-98007071/2020 | L | 30 | F | 2 | 20200903 |
| EPI_ISL_408483 | NSP5 | hCoV-19/Shanghai/IVDC-SH-001/2020 | W | 31 | G | 1 | 20200120 |
| EPI_ISL_480569 | NSP5 | hCoV-19/Australia/VIC702/2020 | L | 32 | F | 2 | 20200328 |
| EPI_ISL_545914 | NSP5 | hCoV-19/USA/TX-HMH-913/2020 | L | 32 | I | 1 | 20200416 |
| EPI_ISL_448360 | NSP5 | hCoV-19/England/NORW-E9CEB/2020 | D | 33 | A | 2 | 20200430 |
| EPI_ISL_528856 | NSP5 | hCoV-19/India/TG-CCMB-X44/2020 | D | 33 | G | 2 | 20200714 |
| EPI_ISL_580046 | NSP5 | hCoV-19/England/ALDP-9EAB6C/2020 | D | 33 | N | 2 | 20200924 |
| EPI_ISL_449330 | NSP5 | hCoV-19/England/LIVE-9A00B/2020 | D | 33 | Y | 4 | 20200414 |
| EPI_ISL_547877 | NSP5 | hCoV-19/India/TG-NIV-906/2020 | D | 33 | E | 3 | 20200000 |
| EPI_ISL_591861 | NSP5 | hCoV-19/Australia/VIC11817/2020 | D | 34 | G | 23 | 20200808 |
| EPI_ISL_597802 | NSP5 | hCoV-19/England/ALDP-A50FA0/2020 | D | 34 | N | 1 | 20201007 |
| EPI_ISL_547877 | NSP5 | hCoV-19/India/TG-NIV-906/2020 | D | 34 | E | 2 | 20200000 |
| EPI_ISL_490697 | NSP5 | hCoV-19/Scotland/CVR3901/2020 | V | 35 | I | 3 | 20200619 |
| EPI_ISL_430812 | NSP5 | hCoV-19/Argentina/PAIS-A0021/2020 | V | 35 | L | 3 | 20200411 |
| EPI_ISL_457519 | NSP5 | hCoV-19/England/NORW-EBEC5/2020 | V | 35 | K | 1 | 20200507 |
| EPI_ISL_482350 | NSP5 | hCoV-19/USA/OR-PROV-075/2020 | V | 35 | A | 2 | 20200417 |
| EPI_ISL_525470 | NSP5 | hCoV-19/Dominican Republic/ICGEB_UNIBE032.8/2020 | V | 36 | D | 2 | 20200506 |
| EPI_ISL_434181 | NSP5 | hCoV-19/USA/WA-S421/2020 | V | 36 | G | 1 | 20200330 |
| EPI_ISL_457519 | NSP5 | hCoV-19/England/NORW-EBEC5/2020 | V | 36 | I | 1 | 20200507 |
| EPI_ISL_508077 | NSP5 | hCoV-19/USA/NM-UNM-00251/2020 | Y | 37 | C | 5 | 20200406 |
| EPI_ISL_515626 | NSP5 | hCoV-19/South Africa/KRISP-K002230/2020 | Y | 37 | H | 3 | 20200721 |
| EPI_ISL_504202 | NSP5 | hCoV-19/South Africa/R12631-20/2020 | C | 38 | G | 1 | 20200616 |
| EPI_ISL_451351 | NSP5 | hCoV-19/Sichuan/SC-PHCC1-030/2020 | C | 38 | L | 1 | 20200127 |
| EPI_ISL_457519 | NSP5 | hCoV-19/England/NORW-EBEC5/2020 | C | 38 | S | 2 | 20200507 |
| EPI_ISL_451351 | NSP5 | hCoV-19/Sichuan/SC-PHCC1-030/2020 | P | 39 | S | 1 | 20200127 |
| EPI_ISL_457519 | NSP5 | hCoV-19/England/NORW-EBEC5/2020 | P | 39 | F | 1 | 20200507 |
| EPI_ISL_451351 | NSP5 | hCoV-19/Sichuan/SC-PHCC1-030/2020 | R | 40 | K | 1 | 20200127 |
| EPI_ISL_457519 | NSP5 | hCoV-19/England/NORW-EBEC5/2020 | R | 40 | V | 1 | 20200507 |
| EPI_ISL_451351 | NSP5 | hCoV-19/Sichuan/SC-PHCC1-030/2020 | H | 41 | T | 1 | 20200127 |
| EPI_ISL_447591 | NSP5 | hCoV-19/Taiwan/TSGH-32/2020 | H | 41 | P | 1 | 20200320 |
| EPI_ISL_457519 | NSP5 | hCoV-19/England/NORW-EBEC5/2020 | H | 41 | S | 1 | 20200507 |
| EPI_ISL_451351 | NSP5 | hCoV-19/Sichuan/SC-PHCC1-030/2020 | V | 42 | L | 3 | 20200127 |
| EPI_ISL_492234 | NSP5 | hCoV-19/England/BRIS-1853DB1/2020 | V | 42 | A | 1 | 20200428 |
| EPI_ISL_462477 | NSP5 | hCoV-19/Spain/AN-ISCIII-202659/2020 | I | 43 | V | 7 | 20200313 |
| EPI_ISL_500443 | NSP5 | hCoV-19/Spain/RI-IBV-006013/2020 | I | 43 | S | 10 | 20200328 |
| EPI_ISL_485992 | NSP5 | hCoV-19/USA/WA-UW-2428/2020 | I | 43 | L | 4 | 20200419 |
| EPI_ISL_500443 | NSP5 | hCoV-19/Spain/RI-IBV-006013/2020 | C | 44 | A | 10 | 20200328 |
| EPI_ISL_457519 | NSP5 | hCoV-19/England/NORW-EBEC5/2020 | C | 44 | I | 1 | 20200507 |
| EPI_ISL_472163 | NSP5 | hCoV-19/England/NORT-281339/2020 | T | 45 | I | 480 | 20200312 |
| EPI_ISL_477816 | NSP5 | hCoV-19/England/CAMB-73C6E/2020 | T | 45 | S | 2 | 20200402 |
| EPI_ISL_500443 | NSP5 | hCoV-19/Spain/RI-IBV-006013/2020 | T | 45 | P | 10 | 20200328 |
| EPI_ISL_497409 | NSP5 | hCoV-19/USA/WA-S1981/2020 | S | 46 | P | 17 | 20200603 |
| EPI_ISL_492441 | NSP5 | hCoV-19/England/BRIS-18539EA/2020 | S | 46 | F | 7 | 20200417 |
| EPI_ISL_478013 | NSP5 | hCoV-19/Scotland/CVR2668/2020 | S | 46 | A | 3 | 20200417 |
| EPI_ISL_500443 | NSP5 | hCoV-19/Spain/RI-IBV-006013/2020 | S | 46 | L | 10 | 20200328 |
| EPI_ISL_500443 | NSP5 | hCoV-19/Spain/RI-IBV-006013/2020 | E | 47 | K | 23 | 20200328 |
| EPI_ISL_488060 | NSP5 | hCoV-19/England/NORT-297C62/2020 | E | 47 | A | 10 | 20200424 |
| EPI_ISL_547748 | NSP5 | hCoV-19/USA/WI-GMF-17808/2020 | E | 47 | G | 1 | 20200829 |
| EPI_ISL_454535 | NSP5 | hCoV-19/India/MH-NIV-5097/2020 | D | 48 | N | 1 | 20200326 |
| EPI_ISL_438401 | NSP5 | hCoV-19/England/CAMB-763FD/2020 | D | 48 | E | 4 | 20200329 |
| EPI_ISL_500443 | NSP5 | hCoV-19/Spain/RI-IBV-006013/2020 | D | 48 | T | 10 | 20200328 |
| EPI_ISL_494478 | NSP5 | hCoV-19/USA/CA-ALSR-1282/2020 | D | 48 | G | 1 | 20200501 |
| EPI_ISL_549865 | NSP5 | hCoV-19/England/MILK-99D38E/2020 | D | 48 | Y | 2 | 20200830 |
| EPI_ISL_425839 | NSP5 | hCoV-19/Scotland/EDB033/2020 | M | 49 | I | 18 | 20200313 |
| EPI_ISL_526535 | NSP5 | hCoV-19/Scotland/EDB7362/2020 | M | 49 | T | 6 | 20200820 |
| EPI_ISL_500443 | NSP5 | hCoV-19/Spain/RI-IBV-006013/2020 | M | 49 | C | 10 | 20200328 |
| EPI_ISL_456497 | NSP5 | hCoV-19/Australia/NT41/2020 | L | 50 | F | 77 | 20200000 |
| EPI_ISL_442976 | NSP5 | hCoV-19/England/CAMB-8127A/2020 | L | 50 | R | 1 | 20200411 |
| EPI_ISL_447591 | NSP5 | hCoV-19/Taiwan/TSGH-32/2020 | L | 50 | H | 1 | 20200320 |
| EPI_ISL_500443 | NSP5 | hCoV-19/Spain/RI-IBV-006013/2020 | N | 51 | T | 10 | 20200328 |
| EPI_ISL_530080 | NSP5 | hCoV-19/Spain/MD-HLP-83/2020 | N | 51 | S | 1 | 20200521 |
| EPI_ISL_500443 | NSP5 | hCoV-19/Spain/RI-IBV-006013/2020 | P | 52 | L | 14 | 20200328 |
| EPI_ISL_428863 | NSP5 | hCoV-19/Russia/Moscow-62508/2020 | P | 52 | S | 3 | 20200311 |
| EPI_ISL_500443 | NSP5 | hCoV-19/Spain/RI-IBV-006013/2020 | N | 53 | I | 10 | 20200328 |
| EPI_ISL_583642 | NSP5 | hCoV-19/Austria/CeMM0682/2020 | N | 53 | D | 1 | 20200418 |
| EPI_ISL_500443 | NSP5 | hCoV-19/Spain/RI-IBV-006013/2020 | Y | 54 | M | 10 | 20200328 |
| EPI_ISL_417919 | NSP5 | hCoV-19/Malaysia/186197/2020 | Y | 54 | C | 1 | 20200314 |
| EPI_ISL_500443 | NSP5 | hCoV-19/Spain/RI-IBV-006013/2020 | E | 55 | K | 10 | 20200328 |
| EPI_ISL_527438 | NSP5 | hCoV-19/USA/CO-CSU-D1085-3/2020 | E | 55 | D | 1 | 20200415 |
| EPI_ISL_500443 | NSP5 | hCoV-19/Spain/RI-IBV-006013/2020 | D | 56 | I | 10 | 20200328 |
| EPI_ISL_500443 | NSP5 | hCoV-19/Spain/RI-IBV-006013/2020 | L | 57 | Y | 10 | 20200328 |
| EPI_ISL_417919 | NSP5 | hCoV-19/Malaysia/186197/2020 | L | 57 | F | 1 | 20200314 |
| EPI_ISL_500443 | NSP5 | hCoV-19/Spain/RI-IBV-006013/2020 | L | 58 | S | 10 | 20200328 |
| EPI_ISL_463070 | NSP5 | hCoV-19/India/OR-ILSCV19346/2020 | I | 59 | N | 1 | 20200514 |
| EPI_ISL_570238 | NSP5 | hCoV-19/USA/WA-UW-9235/2020 | I | 59 | L | 1 | 20200515 |
| EPI_ISL_526456 | NSP5 | hCoV-19/Scotland/CVR1409/2020 | I | 59 | F | 9 | 20200401 |
| EPI_ISL_466581 | NSP5 | hCoV-19/England/20166071304/2020 | I | 59 | V | 1 | 20200416 |
| EPI_ISL_590083 | NSP5 | hCoV-19/England/QEUH-9CF08C/2020 | I | 59 | M | 1 | 20200914 |
| EPI_ISL_418269 | NSP5 | hCoV-19/Vietnam/19-01S/2020 | R | 60 | C | 28 | 20200122 |
| EPI_ISL_547478 | NSP5 | hCoV-19/Netherlands/LI-RIVM-10150/2020 | R | 60 | L | 1 | 20200714 |
| EPI_ISL_508012 | NSP5 | hCoV-19/USA/NM-UNM-00385/2020 | R | 60 | S | 1 | 20200504 |
| EPI_ISL_500443 | NSP5 | hCoV-19/Spain/RI-IBV-006013/2020 | R | 60 | V | 10 | 20200328 |
| EPI_ISL_527438 | NSP5 | hCoV-19/USA/CO-CSU-D1085-3/2020 | R | 60 | G | 1 | 20200415 |
| EPI_ISL_448679 | NSP5 | hCoV-19/England/OXON-AE2B3/2020 | K | 61 | R | 46 | 20200000 |
| EPI_ISL_500443 | NSP5 | hCoV-19/Spain/RI-IBV-006013/2020 | K | 61 | S | 10 | 20200328 |
| EPI_ISL_440813 | NSP5 | hCoV-19/England/CAMB-77C5B/2020 | S | 62 | Y | 18 | 20200331 |
| EPI_ISL_500443 | NSP5 | hCoV-19/Spain/RI-IBV-006013/2020 | S | 62 | L | 10 | 20200328 |
| EPI_ISL_547877 | NSP5 | hCoV-19/India/TG-NIV-906/2020 | S | 62 | T | 1 | 20200000 |
| EPI_ISL_500443 | NSP5 | hCoV-19/Spain/RI-IBV-006013/2020 | N | 63 | I | 10 | 20200328 |
| EPI_ISL_458001 | NSP5 | hCoV-19/USA/NC_200459/2020 | N | 63 | G | 1 | 20200400 |
| EPI_ISL_500443 | NSP5 | hCoV-19/Spain/RI-IBV-006013/2020 | H | 64 | I | 10 | 20200328 |
| EPI_ISL_475743 | NSP5 | hCoV-19/USA/UT-04105/2020 | H | 64 | Y | 1 | 20200512 |
| EPI_ISL_524451 | NSP5 | hCoV-19/USA/NC-UNC-200407/2020 | N | 65 | S | 2 | 20200400 |
| EPI_ISL_500443 | NSP5 | hCoV-19/Spain/RI-IBV-006013/2020 | N | 65 | I | 10 | 20200328 |
| EPI_ISL_500443 | NSP5 | hCoV-19/Spain/RI-IBV-006013/2020 | F | 66 | S | 10 | 20200328 |
| EPI_ISL_488390 | NSP5 | hCoV-19/England/BRIS-12FAFD/2020 | L | 67 | F | 34 | 20200403 |
| EPI_ISL_500443 | NSP5 | hCoV-19/Spain/RI-IBV-006013/2020 | L | 67 | W | 10 | 20200328 |
| EPI_ISL_542443 | NSP5 | hCoV-19/Italy/LOM-UniMI-L99/2020 | L | 67 | S | 1 | 20200310 |
| EPI_ISL_556362 | NSP5 | hCoV-19/England/ALDP-94A177/2020 | V | 68 | A | 10 | 20200611 |
| EPI_ISL_500443 | NSP5 | hCoV-19/Spain/RI-IBV-006013/2020 | V | 68 | Y | 10 | 20200328 |
| EPI_ISL_571401 | NSP5 | hCoV-19/USA/WA-QDX-528/2020 | V | 68 | L | 8 | 20200318 |
| EPI_ISL_591333 | NSP5 | hCoV-19/Italy/SI-UOS-6/2020 | V | 68 | I | 2 | 20200321 |
| EPI_ISL_457519 | NSP5 | hCoV-19/England/NORW-EBEC5/2020 | V | 68 | W | 1 | 20200507 |
| EPI_ISL_467825 | NSP5 | hCoV-19/USA/CA-QDX-21/2020 | Q | 69 | R | 21 | 20200315 |
| EPI_ISL_426621 | NSP5 | hCoV-19/USA/NY-NYUMC166/2020 | Q | 69 | H | 2 | 20200401 |
| EPI_ISL_492081 | NSP5 | hCoV-19/North Macedonia/ChVir7911/2020 | Q | 69 | V | 1 | 20200627 |
| EPI_ISL_457519 | NSP5 | hCoV-19/England/NORW-EBEC5/2020 | Q | 69 | Y | 1 | 20200507 |
| EPI_ISL_444383 | NSP5 | hCoV-19/England/CAMB-1AC1F3/2020 | A | 70 | T | 116 | 20200000 |
| EPI_ISL_569413 | NSP5 | hCoV-19/France/PAC-IHU-0254/2020 | A | 70 | S | 13 | 20200330 |
| EPI_ISL_596672 | NSP5 | hCoV-19/Ireland/D-SVUH-R7287/2020 | A | 70 | V | 6 | 20200410 |
| EPI_ISL_499413 | NSP5 | hCoV-19/Wales/PHWC-1693CF/2020 | A | 70 | P | 1 | 20200331 |
| EPI_ISL_500443 | NSP5 | hCoV-19/Spain/RI-IBV-006013/2020 | A | 70 | L | 10 | 20200328 |
| EPI_ISL_593791 | NSP5 | hCoV-19/England/204221392/2020 | G | 71 | S | 1601 | 20200000 |
| EPI_ISL_500443 | NSP5 | hCoV-19/Spain/RI-IBV-006013/2020 | G | 71 | V | 11 | 20200328 |
| EPI_ISL_478497 | NSP5 | hCoV-19/England/NORT-28357D/2020 | G | 71 | D | 3 | 20200331 |
| EPI_ISL_500443 | NSP5 | hCoV-19/Spain/RI-IBV-006013/2020 | N | 72 | M | 10 | 20200328 |
| EPI_ISL_585585 | NSP5 | hCoV-19/Scotland/QEUH-A02A8E/2020 | N | 72 | K | 1 | 20201001 |
| EPI_ISL_501141 | NSP5 | hCoV-19/USA/WA-UW-13356/2020 | N | 72 | S | 1 | 20200701 |
| EPI_ISL_595278 | NSP5 | hCoV-19/England/NOTT-1159C0/2020 | N | 72 | Y | 1 | 20201015 |
| EPI_ISL_581449 | NSP5 | hCoV-19/India/WB-IICB-017/2020 | V | 73 | I | 3 | 20200804 |
| EPI_ISL_500443 | NSP5 | hCoV-19/Spain/RI-IBV-006013/2020 | V | 73 | F | 10 | 20200328 |
| EPI_ISL_461186 | NSP5 | hCoV-19/Netherlands/NoordBrabant_151/2020 | V | 73 | A | 1 | 20200429 |
| EPI_ISL_500443 | NSP5 | hCoV-19/Spain/RI-IBV-006013/2020 | Q | 74 | N | 10 | 20200328 |
| EPI_ISL_478745 | NSP5 | hCoV-19/England/OXON-AF4E9/2020 | L | 75 | F | 86 | 20200000 |
| EPI_ISL_500443 | NSP5 | hCoV-19/Spain/RI-IBV-006013/2020 | L | 75 | S | 10 | 20200328 |
| EPI_ISL_555985 | NSP5 | hCoV-19/England/ALDP-94CD26/2020 | L | 75 | R | 2 | 20200614 |
| EPI_ISL_528804 | NSP5 | hCoV-19/England/BHRT-24B372B/2020 | R | 76 | S | 13 | 20200515 |
| EPI_ISL_500443 | NSP5 | hCoV-19/Spain/RI-IBV-006013/2020 | R | 76 | G | 10 | 20200328 |
| EPI_ISL_504198 | NSP5 | hCoV-19/South Africa/R12597-20/2020 | R | 76 | K | 2 | 20200616 |
| EPI_ISL_500443 | NSP5 | hCoV-19/Spain/RI-IBV-006013/2020 | V | 77 | L | 10 | 20200328 |
| EPI_ISL_420520 | NSP5 | hCoV-19/England/20136015502/2020 | V | 77 | A | 1 | 20200324 |
| EPI_ISL_477087 | NSP5 | hCoV-19/Canada/BC_02018462/2020 | I | 78 | V | 22 | 20200300 |
| EPI_ISL_569827 | NSP5 | hCoV-19/Russia/OMS-ORINFI-1631S/2020 | I | 78 | S | 3 | 20200629 |
| EPI_ISL_500443 | NSP5 | hCoV-19/Spain/RI-IBV-006013/2020 | I | 78 | L | 10 | 20200328 |
| EPI_ISL_500443 | NSP5 | hCoV-19/Spain/RI-IBV-006013/2020 | G | 79 | D | 10 | 20200328 |
| EPI_ISL_497714 | NSP5 | hCoV-19/USA/WA-S2286/2020 | H | 80 | N | 44 | 20200610 |
| EPI_ISL_500443 | NSP5 | hCoV-19/Spain/RI-IBV-006013/2020 | H | 80 | I | 10 | 20200328 |
| EPI_ISL_562579 | NSP5 | hCoV-19/Australia/VIC1357/2020 | H | 80 | L | 1 | 20200416 |
| EPI_ISL_453654 | NSP5 | hCoV-19/England/NOTT-111399/2020 | H | 80 | Y | 2 | 20200513 |
| EPI_ISL_437776 | NSP5 | hCoV-19/USA/VA-DCLS-0137/2020 | S | 81 | F | 24 | 20200416 |
| EPI_ISL_500443 | NSP5 | hCoV-19/Spain/RI-IBV-006013/2020 | S | 81 | L | 10 | 20200328 |
| EPI_ISL_526481 | NSP5 | hCoV-19/Scotland/EDB4387/2020 | M | 82 | I | 20 | 20200504 |
| EPI_ISL_478279 | NSP5 | hCoV-19/England/EXET-135E07/2020 | M | 82 | T | 1 | 20200406 |
| EPI_ISL_500443 | NSP5 | hCoV-19/Spain/RI-IBV-006013/2020 | M | 82 | C | 10 | 20200328 |
| EPI_ISL_577852 | NSP5 | hCoV-19/Netherlands/NH-EMC-56/2020 | Q | 83 | K | 411 | 20200000 |
| EPI_ISL_476531 | NSP5 | hCoV-19/USA/CT-Yale-302/2020 | Q | 83 | L | 3 | 20200328 |
| EPI_ISL_593673 | NSP5 | hCoV-19/Australia/NSW1065/2020 | N | 84 | Y | 3 | 20200802 |
| EPI_ISL_507007 | NSP5 | hCoV-19/Iran/IRVSH-01/2020 | N | 84 | S | 6 | 20200501 |
| EPI_ISL_500443 | NSP5 | hCoV-19/Spain/RI-IBV-006013/2020 | N | 84 | I | 9 | 20200328 |
| EPI_ISL_465209 | NSP5 | hCoV-19/England/20169020704/2020 | N | 84 | D | 1 | 20200418 |
| EPI_ISL_442236 | NSP5 | hCoV-19/England/CAMB-7DF01/2020 | N | 84 | K | 1 | 20200407 |
| EPI_ISL_538801 | NSP5 | hCoV-19/England/LEED-2AA0E8/2020 | C | 85 | F | 2 | 20200408 |
| EPI_ISL_500443 | NSP5 | hCoV-19/Spain/RI-IBV-006013/2020 | C | 85 | V | 9 | 20200328 |
| EPI_ISL_426737 | NSP5 | hCoV-19/Australia/VIC440/2020 | V | 86 | I | 6 | 20200326 |
| EPI_ISL_500443 | NSP5 | hCoV-19/Spain/RI-IBV-006013/2020 | V | 86 | Y | 9 | 20200328 |
| EPI_ISL_435354 | NSP5 | hCoV-19/USA/UT-0366/2020 | V | 86 | E | 1 | 20200328 |
| EPI_ISL_492837 | NSP5 | hCoV-19/England/LOND-124C391/2020 | V | 86 | A | 2 | 20200412 |
| EPI_ISL_496728 | NSP5 | hCoV-19/Panama/332857/2020 | L | 87 | F | 9 | 20200324 |
| EPI_ISL_523391 | NSP5 | hCoV-19/Netherlands/NB-EMC-269/2020 | K | 88 | R | 35 | 20200000 |
| EPI_ISL_508958 | NSP5 | hCoV-19/France/ARA-17177/2020 | K | 88 | N | 9 | 20200330 |
| EPI_ISL_500443 | NSP5 | hCoV-19/Spain/RI-IBV-006013/2020 | K | 88 | S | 9 | 20200328 |
| EPI_ISL_424868 | NSP5 | hCoV-19/USA/LA_0842/2020 | L | 89 | F | 2392 | 20200309 |
| EPI_ISL_548736 | NSP5 | hCoV-19/Canada/ON-PHL-20-00060/2020 | K | 90 | R | 1087 | 20200000 |
| EPI_ISL_432410 | NSP5 | hCoV-19/Wales/PHWC-27A8D/2020 | K | 90 | N | 20 | 20200330 |
| EPI_ISL_471418 | NSP5 | hCoV-19/Romania/Focsani-268927/2020 | K | 90 | P | 1 | 20200409 |
| EPI_ISL_500443 | NSP5 | hCoV-19/Spain/RI-IBV-006013/2020 | V | 91 | L | 9 | 20200328 |
| EPI_ISL_542902 | NSP5 | hCoV-19/USA/TX-HMH-1919/2020 | V | 91 | I | 2 | 20200415 |
| EPI_ISL_571911 | NSP5 | hCoV-19/USA/WI-QDX-1075/2020 | D | 92 | E | 2 | 20200318 |
| EPI_ISL_542191 | NSP5 | hCoV-19/Italy/LOM-UniMI-L203/2020 | D | 92 | G | 6 | 20200322 |
| EPI_ISL_500443 | NSP5 | hCoV-19/Spain/RI-IBV-006013/2020 | D | 92 | I | 9 | 20200328 |
| EPI_ISL_466189 | NSP5 | hCoV-19/England/20149038204/2020 | D | 92 | N | 1 | 20200403 |
| EPI_ISL_478995 | NSP5 | hCoV-19/England/OXON-B10C2/2020 | D | 92 | Y | 2 | 20200423 |
| EPI_ISL_461542 | NSP5 | hCoV-19/England/BIRM-5FF8D/2020 | T | 93 | I | 49 | 20200000 |
| EPI_ISL_500443 | NSP5 | hCoV-19/Spain/RI-IBV-006013/2020 | T | 93 | Q | 9 | 20200328 |
| EPI_ISL_448642 | NSP5 | hCoV-19/England/OXON-ADE92/2020 | A | 94 | V | 39 | 20200000 |
| EPI_ISL_500443 | NSP5 | hCoV-19/Spain/RI-IBV-006013/2020 | A | 94 | N | 1 | 20200328 |
| EPI_ISL_526456 | NSP5 | hCoV-19/Scotland/CVR1409/2020 | A | 94 | P | 8 | 20200401 |
| EPI_ISL_526456 | NSP5 | hCoV-19/Scotland/CVR1409/2020 | N | 95 | I | 8 | 20200401 |
| EPI_ISL_572979 | NSP5 | hCoV-19/England/ALDP-9B5F6E/2020 | N | 95 | H | 1 | 20200828 |
| EPI_ISL_418759 | NSP5 | hCoV-19/England/20126026202/2020 | P | 96 | L | 41 | 20200318 |
| EPI_ISL_578631 | NSP5 | hCoV-19/USA/WI-WSLH-200490/2020 | P | 96 | S | 21 | 20200520 |
| EPI_ISL_454351 | NSP5 | hCoV-19/Portugal/PT0628/2020 | P | 96 | H | 2 | 20200406 |
| EPI_ISL_500443 | NSP5 | hCoV-19/Spain/RI-IBV-006013/2020 | K | 97 | P | 1 | 20200328 |
| EPI_ISL_526456 | NSP5 | hCoV-19/Scotland/CVR1409/2020 | K | 97 | R | 9 | 20200401 |
| EPI_ISL_599093 | NSP5 | hCoV-19/Scotland/QEUH-A20CFD/2020 | K | 97 | N | 1 | 20201001 |
| EPI_ISL_512602 | NSP5 | hCoV-19/Ukraine/203100322/2020 | K | 97 | Q | 1 | 20200526 |
| EPI_ISL_493715 | NSP5 | hCoV-19/England/SHEF-CDBB3/2020 | T | 98 | I | 2 | 20200511 |
| EPI_ISL_500443 | NSP5 | hCoV-19/Spain/RI-IBV-006013/2020 | T | 98 | K | 1 | 20200328 |
| EPI_ISL_526456 | NSP5 | hCoV-19/Scotland/CVR1409/2020 | T | 98 | H | 8 | 20200401 |
| EPI_ISL_493399 | NSP5 | hCoV-19/Singapore/639/2020 | P | 99 | S | 7 | 20200506 |
| EPI_ISL_419756 | NSP5 | hCoV-19/Australia/VIC38/2020 | P | 99 | L | 10 | 20200311 |
| EPI_ISL_500443 | NSP5 | hCoV-19/Spain/RI-IBV-006013/2020 | P | 99 | T | 1 | 20200328 |
| EPI_ISL_478279 | NSP5 | hCoV-19/England/EXET-135E07/2020 | K | 100 | R | 2 | 20200406 |
| EPI_ISL_526456 | NSP5 | hCoV-19/Scotland/CVR1409/2020 | K | 100 | S | 8 | 20200401 |
| EPI_ISL_535887 | NSP5 | hCoV-19/Canada/QC-LSPQ-L00229212/2020 | K | 100 | N | 3 | 20200320 |
| EPI_ISL_478279 | NSP5 | hCoV-19/England/EXET-135E07/2020 | Y | 101 | T | 1 | 20200406 |
| EPI_ISL_526456 | NSP5 | hCoV-19/Scotland/CVR1409/2020 | Y | 101 | I | 8 | 20200401 |
| EPI_ISL_425132 | NSP5 | hCoV-19/Germany/NW-HHU-48/2020 | Y | 101 | C | 2 | 20200323 |
| EPI_ISL_570077 | NSP5 | hCoV-19/USA/WA-UW-5776/2020 | Y | 101 | S | 1 | 20200407 |
| EPI_ISL_478279 | NSP5 | hCoV-19/England/EXET-135E07/2020 | K | 102 | D | 1 | 20200406 |
| EPI_ISL_526456 | NSP5 | hCoV-19/Scotland/CVR1409/2020 | K | 102 | S | 8 | 20200401 |
| EPI_ISL_586006 | NSP5 | hCoV-19/Wales/PHWC-16F6C0/2020 | K | 102 | N | 2 | 20201005 |
| EPI_ISL_508496 | NSP5 | hCoV-19/India/HR-TF2/2020 | F | 103 | C | 1 | 20200614 |
| EPI_ISL_526456 | NSP5 | hCoV-19/Scotland/CVR1409/2020 | F | 103 | L | 8 | 20200401 |
| EPI_ISL_434181 | NSP5 | hCoV-19/USA/WA-S421/2020 | V | 104 | A | 2 | 20200330 |
| EPI_ISL_566219 | NSP5 | hCoV-19/Wales/ALDP-9CD367/2020 | V | 104 | I | 4 | 20200916 |
| EPI_ISL_440142 | NSP5 | hCoV-19/England/BRIS-121967/2020 | V | 104 | F | 9 | 20200313 |
| EPI_ISL_478279 | NSP5 | hCoV-19/England/EXET-135E07/2020 | R | 105 | S | 2 | 20200406 |
| EPI_ISL_419573 | NSP5 | hCoV-19/Luxembourg/LNS1874423/2020 | R | 105 | H | 8 | 20200311 |
| EPI_ISL_526456 | NSP5 | hCoV-19/Scotland/CVR1409/2020 | R | 105 | A | 7 | 20200401 |
| EPI_ISL_486839 | NSP5 | hCoV-19/India/KA-InStem-NCBS-0090/2020 | R | 105 | C | 1 | 20200000 |
| EPI_ISL_430723 | NSP5 | hCoV-19/Beijing/BJ416/2020 | R | 105 | L | 1 | 20200201 |
| EPI_ISL_543614 | NSP5 | hCoV-19/USA/TX-HMH-443/2020 | R | 105 | P | 1 | 20200403 |
| EPI_ISL_483691 | NSP5 | hCoV-19/Bangladesh/BCSIR-NILMRC-210/2020 | I | 106 | S | 2 | 20200614 |
| EPI_ISL_526456 | NSP5 | hCoV-19/Scotland/CVR1409/2020 | I | 106 | F | 8 | 20200401 |
| EPI_ISL_478279 | NSP5 | hCoV-19/England/EXET-135E07/2020 | I | 106 | V | 1 | 20200406 |
| EPI_ISL_478279 | NSP5 | hCoV-19/England/EXET-135E07/2020 | Q | 107 | S | 1 | 20200406 |
| EPI_ISL_526456 | NSP5 | hCoV-19/Scotland/CVR1409/2020 | Q | 107 | N | 7 | 20200401 |
| EPI_ISL_480583 | NSP5 | hCoV-19/Australia/VIC1130/2020 | Q | 107 | H | 1 | 20200408 |
| EPI_ISL_475129 | NSP5 | hCoV-19/Sweden/20-50299/2020 | P | 108 | S | 290 | 20200312 |
| EPI_ISL_561206 | NSP5 | hCoV-19/Gambia/NPHL-061/2020 | P | 108 | L | 47 | 20200000 |
| EPI_ISL_526456 | NSP5 | hCoV-19/Scotland/CVR1409/2020 | P | 108 | Q | 7 | 20200401 |
| EPI_ISL_554640 | NSP5 | hCoV-19/England/ALDP-9446BA/2020 | P | 108 | T | 1 | 20200607 |
| EPI_ISL_478279 | NSP5 | hCoV-19/England/EXET-135E07/2020 | G | 109 | L | 1 | 20200406 |
| EPI_ISL_526456 | NSP5 | hCoV-19/Scotland/CVR1409/2020 | G | 109 | D | 7 | 20200401 |
| EPI_ISL_440994 | NSP5 | hCoV-19/England/LOND-D383B/2020 | Q | 110 | H | 3 | 20200402 |
| EPI_ISL_526456 | NSP5 | hCoV-19/Scotland/CVR1409/2020 | Q | 110 | R | 7 | 20200401 |
| EPI_ISL_507007 | NSP5 | hCoV-19/Iran/IRVSH-01/2020 | T | 111 | N | 1 | 20200501 |
| EPI_ISL_478279 | NSP5 | hCoV-19/England/EXET-135E07/2020 | T | 111 | W | 1 | 20200406 |
| EPI_ISL_484980 | NSP5 | hCoV-19/USA/WI-UW-605/2020 | T | 111 | L | 5 | 20200625 |
| EPI_ISL_457132 | NSP5 | hCoV-19/England/EXET-135AA9/2020 | F | 112 | L | 2 | 20200326 |
| EPI_ISL_478279 | NSP5 | hCoV-19/England/EXET-135E07/2020 | S | 113 | T | 2 | 20200406 |
| EPI_ISL_478279 | NSP5 | hCoV-19/England/EXET-135E07/2020 | V | 114 | I | 1 | 20200406 |
| EPI_ISL_571264 | NSP5 | hCoV-19/USA/AZ-QDX-518/2020 | V | 114 | L | 3 | 20200318 |
| EPI_ISL_469035 | NSP5 | hCoV-19/India/GJ-GBRC191b/2020 | V | 114 | G | 1 | 20200605 |
| EPI_ISL_522406 | NSP5 | hCoV-19/Dominican Republic/ICGEB-UNIBE024/2020 | L | 115 | F | 1 | 20200228 |
| EPI_ISL_478279 | NSP5 | hCoV-19/England/EXET-135E07/2020 | L | 115 | W | 1 | 20200406 |
| EPI_ISL_512756 | NSP5 | hCoV-19/Australia/WA103/2020 | A | 116 | T | 3 | 20200327 |
| EPI_ISL_542143 | NSP5 | hCoV-19/Italy/LOM-UniMI-L148/2020 | A | 116 | V | 25 | 20200307 |
| EPI_ISL_478279 | NSP5 | hCoV-19/England/EXET-135E07/2020 | A | 116 | M | 1 | 20200406 |
| EPI_ISL_521413 | NSP5 | hCoV-19/Australia/VIC6657/2020 | A | 116 | S | 2 | 20200719 |
| EPI_ISL_571804 | NSP5 | hCoV-19/USA/CA-QDX-1064/2020 | C | 117 | S | 1 | 20200320 |
| EPI_ISL_522406 | NSP5 | hCoV-19/Dominican Republic/ICGEB-UNIBE024/2020 | Y | 118 | F | 1 | 20200228 |
| EPI_ISL_455366 | NSP5 | hCoV-19/Wuhan/HB-WH1-133/2020 | G | 120 | C | 8 | 20200223 |
| EPI_ISL_463229 | NSP5 | hCoV-19/Canada/BC_25857092/2020 | S | 121 | L | 9 | 20200300 |
| EPI_ISL_437530 | NSP5 | hCoV-19/USA/OR-OHSU-0050/2020 | S | 121 | A | 1 | 20200416 |
| EPI_ISL_474810 | NSP5 | hCoV-19/Spain/CM-IBV-003777/2020 | S | 121 | T | 1 | 20200403 |
| EPI_ISL_487759 | NSP5 | hCoV-19/Scotland/EDB3445/2020 | P | 122 | S | 3 | 20200410 |
| EPI_ISL_418966 | NSP5 | hCoV-19/USA/UT-024/2020 | S | 123 | F | 3 | 20200310 |
| EPI_ISL_447568 | NSP5 | hCoV-19/India/TG-CCMB-J166/2020 | S | 123 | P | 1 | 20200401 |
| EPI_ISL_551136 | NSP5 | hCoV-19/England/MILK-9A8E34/2020 | G | 124 | S | 1 | 20200830 |
| EPI_ISL_522406 | NSP5 | hCoV-19/Dominican Republic/ICGEB-UNIBE024/2020 | V | 125 | F | 1 | 20200228 |
| EPI_ISL_459966 | NSP5 | hCoV-19/Morocco/6888/2020 | V | 125 | I | 8 | 20200315 |
| EPI_ISL_455084 | NSP5 | hCoV-19/Australia/NSW545/2020 | Q | 127 | H | 7 | 20200405 |
| EPI_ISL_447537 | NSP5 | hCoV-19/India/GJ-GBRC78b/2020 | Q | 127 | R | 1 | 20200505 |
| EPI_ISL_571303 | NSP5 | hCoV-19/USA/ID-QDX-609/2020 | A | 129 | V | 121 | 20200318 |
| EPI_ISL_583632 | NSP5 | hCoV-19/Austria/CeMM0664/2020 | M | 130 | T | 1 | 20200515 |
| EPI_ISL_510058 | NSP5 | hCoV-19/Spain/AN-IBV-004121/2020 | M | 130 | I | 3 | 20200603 |
| EPI_ISL_500931 | NSP5 | hCoV-19/Switzerland/BE-ETHZ-190073/2020 | R | 131 | S | 1 | 20200704 |
| EPI_ISL_478279 | NSP5 | hCoV-19/England/EXET-135E07/2020 | R | 131 | E | 1 | 20200406 |
| EPI_ISL_582514 | NSP5 | hCoV-19/Portugal/PT0939/2020 | R | 131 | G | 1 | 20200408 |
| EPI_ISL_508145 | NSP5 | hCoV-19/Australia/SAP460/2020 | R | 131 | M | 1 | 20200401 |
| EPI_ISL_579355 | NSP5 | hCoV-19/New Zealand/20VR2928/2020 | P | 132 | S | 119 | 20200000 |
| EPI_ISL_523317 | NSP5 | hCoV-19/Netherlands/NB-EMC-194/2020 | P | 132 | L | 160 | 20200000 |
| EPI_ISL_509616 | NSP5 | hCoV-19/Spain/PV-IBV-001537/2020 | F | 134 | C | 3 | 20200316 |
| EPI_ISL_458517 | NSP5 | hCoV-19/England/CAMB-1B15C2/2020 | F | 134 | S | 1 | 20200506 |
| EPI_ISL_572847 | NSP5 | hCoV-19/England/ALDP-9CC535/2020 | F | 134 | L | 1 | 20200916 |
| EPI_ISL_425655 | NSP5 | hCoV-19/Scotland/CVR11/2020 | T | 135 | I | 67 | 20200310 |
| EPI_ISL_413930 | NSP5 | hCoV-19/USA/CA-CDPH-UC10/2020 | I | 136 | V | 7 | 20200305 |
| EPI_ISL_437536 | NSP5 | hCoV-19/India/WB-S1/2020 | I | 136 | T | 1 | 20200319 |
| EPI_ISL_435059 | NSP5 | hCoV-19/South Africa/R05475/2020 | G | 138 | V | 1 | 20200320 |
| EPI_ISL_592797 | NSP5 | hCoV-19/Australia/VIC15455/2020 | S | 139 | L | 1 | 20200802 |
| EPI_ISL_466374 | NSP5 | hCoV-19/England/201590136/2020 | S | 139 | A | 1 | 20200412 |
| EPI_ISL_437536 | NSP5 | hCoV-19/India/WB-S1/2020 | F | 140 | V | 1 | 20200319 |
| EPI_ISL_427164 | NSP5 | hCoV-19/USA/CT-UW-4251/2020 | N | 142 | S | 11 | 20200331 |
| EPI_ISL_437449 | NSP5 | hCoV-19/India/GJ-GBRC20/2020 | N | 142 | L | 5 | 20200426 |
| EPI_ISL_435059 | NSP5 | hCoV-19/South Africa/R05475/2020 | N | 142 | I | 1 | 20200320 |
| EPI_ISL_475628 | NSP5 | hCoV-19/USA/CA-CSMC19/2020 | G | 143 | S | 7 | 20200325 |
| EPI_ISL_592799 | NSP5 | hCoV-19/Australia/VIC14588/2020 | G | 143 | A | 1 | 20200829 |
| EPI_ISL_435059 | NSP5 | hCoV-19/South Africa/R05475/2020 | G | 143 | V | 1 | 20200320 |
| EPI_ISL_487274 | NSP5 | hCoV-19/Bahrain/023232093/2020 | S | 144 | E | 2 | 20200624 |
| EPI_ISL_508714 | NSP5 | hCoV-19/USA/FL-BPHL-0511/2020 | S | 144 | L | 1 | 20200610 |
| EPI_ISL_487274 | NSP5 | hCoV-19/Bahrain/023232093/2020 | C | 145 | I | 2 | 20200624 |
| EPI_ISL_570804 | NSP5 | hCoV-19/USA/WA-UW-19700/2020 | C | 145 | F | 1 | 20200801 |
| EPI_ISL_515286 | NSP5 | hCoV-19/USA/WA-UW-4610/2020 | S | 147 | I | 1 | 20200326 |
| EPI_ISL_453654 | NSP5 | hCoV-19/England/NOTT-111399/2020 | V | 148 | I | 9 | 20200513 |
| EPI_ISL_420357 | NSP5 | hCoV-19/Belgium/JLJ-0320101/2020 | V | 148 | F | 1 | 20200320 |
| EPI_ISL_417778 | NSP5 | hCoV-19/Iceland/105/2020 | G | 149 | V | 1 | 20200310 |
| EPI_ISL_475592 | NSP5 | hCoV-19/USA/CA-CSMC116/2020 | G | 149 | C | 1 | 20200411 |
| EPI_ISL_420509 | NSP5 | hCoV-19/England/20132073702/2020 | N | 151 | D | 15 | 20200323 |
| EPI_ISL_551890 | NSP5 | hCoV-19/England/CAMC-990C26/2020 | N | 151 | S | 1 | 20200827 |
| EPI_ISL_435059 | NSP5 | hCoV-19/South Africa/R05475/2020 | N | 151 | Y | 2 | 20200320 |
| EPI_ISL_431784 | NSP5 | hCoV-19/Fujian/IM3520017T/2020 | I | 152 | V | 4 | 20200318 |
| EPI_ISL_522800 | NSP5 | hCoV-19/USA/VA-DCLS-0935/2020 | I | 152 | M | 1 | 20200521 |
| EPI_ISL_528123 | NSP5 | hCoV-19/Switzerland/BS-UHB-42192039/2020 | I | 152 | T | 1 | 20200315 |
| EPI_ISL_435059 | NSP5 | hCoV-19/South Africa/R05475/2020 | I | 152 | L | 1 | 20200320 |
| EPI_ISL_470120 | NSP5 | hCoV-19/England/CAMB-1AB5DA/2020 | D | 153 | E | 2 | 20200421 |
| EPI_ISL_437584 | NSP5 | hCoV-19/USA/CA-SR0199/2020 | D | 153 | G | 2 | 20200315 |
| EPI_ISL_441678 | NSP5 | hCoV-19/England/CAMB-7DBB2/2020 | D | 153 | N | 2 | 20200406 |
| EPI_ISL_513031 | NSP5 | hCoV-19/SaudiArabia/KAUST-JEDDAH879/2020 | D | 155 | G | 1 | 20200524 |
| EPI_ISL_432937 | NSP5 | hCoV-19/England/NOTT-10EEAD/2020 | C | 156 | Y | 4 | 20200328 |
| EPI_ISL_493451 | NSP5 | hCoV-19/England/BIRM-61717/2020 | C | 156 | R | 8 | 20200428 |
| EPI_ISL_585187 | NSP5 | hCoV-19/Northern Ireland/NIRE-1083B3/2020 | C | 156 | W | 1 | 20200912 |
| EPI_ISL_430911 | NSP5 | hCoV-19/USA/WA-UW-5617/2020 | C | 156 | F | 3 | 20200408 |
| EPI_ISL_415503 | NSP5 | hCoV-19/Netherlands/NoordBrabant_46/2020 | V | 157 | I | 4 | 20200311 |
| EPI_ISL_426028 | NSP5 | hCoV-19/USA/NY-Wadsworth-10690-01/2020 | V | 157 | L | 45 | 20200304 |
| EPI_ISL_574543 | NSP5 | hCoV-19/USA/SC-DHEC-1148/2020 | V | 157 | F | 1 | 20200710 |
| EPI_ISL_529146 | NSP5 | hCoV-19/Germany/HE-FFM2/2020 | V | 157 | A | 1 | 20200200 |
| EPI_ISL_465848 | NSP5 | hCoV-19/England/201390491/2020 | S | 158 | F | 3 | 20200328 |
| EPI_ISL_455047 | NSP5 | hCoV-19/Australia/NSW507/2020 | S | 158 | A | 1 | 20200406 |
| EPI_ISL_435059 | NSP5 | hCoV-19/South Africa/R05475/2020 | S | 158 | T | 1 | 20200320 |
| EPI_ISL_493585 | NSP5 | hCoV-19/England/NOTT-112AEE/2020 | F | 159 | L | 2 | 20200424 |
| EPI_ISL_510451 | NSP5 | hCoV-19/Spain/AN-IBV-006122/2020 | F | 159 | Y | 1 | 20200410 |
| EPI_ISL_600461 | NSP5 | hCoV-19/Bangladesh/G-115/2020 | C | 160 | T | 1 | 20200620 |
| EPI_ISL_553356 | NSP5 | hCoV-19/England/ALDP-95A736/2020 | C | 160 | F | 8 | 20200611 |
| EPI_ISL_437566 | NSP5 | hCoV-19/USA/CA-SR0240/2020 | C | 160 | Y | 2 | 20200324 |
| EPI_ISL_417413 | NSP5 | hCoV-19/Turkey/6224-Ankara1034/2020 | C | 160 | S | 1 | 20200317 |
| EPI_ISL_483719 | NSP5 | hCoV-19/Israel/n14291/2020 | C | 160 | L | 1 | 20200405 |
| EPI_ISL_483723 | NSP5 | hCoV-19/Israel/n14277/2020 | Y | 161 | C | 1 | 20200323 |
| EPI_ISL_600461 | NSP5 | hCoV-19/Bangladesh/G-115/2020 | Y | 161 | M | 1 | 20200620 |
| EPI_ISL_483719 | NSP5 | hCoV-19/Israel/n14291/2020 | Y | 161 | L | 1 | 20200405 |
| EPI_ISL_459046 | NSP5 | hCoV-19/England/BRIS-126346/2020 | M | 162 | I | 38 | 20200410 |
| EPI_ISL_472438 | NSP5 | hCoV-19/Wales/PHWC-15C0F5/2020 | M | 162 | V | 2 | 20200505 |
| EPI_ISL_483719 | NSP5 | hCoV-19/Israel/n14291/2020 | M | 162 | H | 1 | 20200405 |
| EPI_ISL_435059 | NSP5 | hCoV-19/South Africa/R05475/2020 | M | 162 | L | 1 | 20200320 |
| EPI_ISL_475589 | NSP5 | hCoV-19/USA/CA-CSMC113/2020 | H | 163 | N | 1 | 20200322 |
| EPI_ISL_483719 | NSP5 | hCoV-19/Israel/n14291/2020 | H | 163 | A | 1 | 20200405 |
| EPI_ISL_483719 | NSP5 | hCoV-19/Israel/n14291/2020 | H | 164 | P | 1 | 20200405 |
| EPI_ISL_463893 | NSP5 | hCoV-19/Bosnia and Herzegovina/03_Tuzla/2020 | M | 165 | L | 2 | 20200525 |
| EPI_ISL_570886 | NSP5 | hCoV-19/USA/WA-UW-12659/2020 | M | 165 | K | 4 | 20200629 |
| EPI_ISL_416347 | NSP5 | hCoV-19/Shanghai/SH0038/2020 | M | 165 | I | 2 | 20200206 |
| EPI_ISL_483719 | NSP5 | hCoV-19/Israel/n14291/2020 | M | 165 | Y | 1 | 20200405 |
| EPI_ISL_507007 | NSP5 | hCoV-19/Iran/IRVSH-01/2020 | E | 166 | V | 2 | 20200501 |
| EPI_ISL_483719 | NSP5 | hCoV-19/Israel/n14291/2020 | E | 166 | G | 1 | 20200405 |
| EPI_ISL_483719 | NSP5 | hCoV-19/Israel/n14291/2020 | L | 167 | I | 2 | 20200405 |
| EPI_ISL_428789 | NSP5 | hCoV-19/USA/NY-NYUMC275/2020 | P | 168 | S | 8 | 20200406 |
| EPI_ISL_486468 | NSP5 | hCoV-19/Switzerland/AG-ETHZ-110031/2020 | P | 168 | L | 1 | 20200401 |
| EPI_ISL_483719 | NSP5 | hCoV-19/Israel/n14291/2020 | P | 168 | T | 1 | 20200405 |
| EPI_ISL_451126 | NSP5 | hCoV-19/Australia/SAP091/2020 | T | 169 | I | 10 | 20200401 |
| EPI_ISL_513883 | NSP5 | hCoV-19/USA/CA-CZB-2492/2020 | T | 169 | P | 1 | 20200528 |
| EPI_ISL_483719 | NSP5 | hCoV-19/Israel/n14291/2020 | T | 169 | N | 1 | 20200405 |
| EPI_ISL_432708 | NSP5 | hCoV-19/England/NOTT-10FCB1/2020 | G | 170 | R | 10 | 20200408 |
| EPI_ISL_483719 | NSP5 | hCoV-19/Israel/n14291/2020 | G | 170 | W | 1 | 20200405 |
| EPI_ISL_558908 | NSP5 | hCoV-19/England/ALDP-51F5CE/2020 | V | 171 | L | 23 | 20200602 |
| EPI_ISL_539499 | NSP5 | hCoV-19/Spain/AN-ISCIII-202657/2020 | V | 171 | I | 5 | 20200312 |
| EPI_ISL_552182 | NSP5 | hCoV-19/Wales/MILK-992BCD/2020 | V | 171 | F | 1 | 20200826 |
| EPI_ISL_483719 | NSP5 | hCoV-19/Israel/n14291/2020 | V | 171 | S | 1 | 20200405 |
| EPI_ISL_483719 | NSP5 | hCoV-19/Israel/n14291/2020 | H | 172 | S | 1 | 20200405 |
| EPI_ISL_522968 | NSP5 | hCoV-19/USA/TX-DSHS-0142/2020 | A | 173 | S | 3 | 20200507 |
| EPI_ISL_418082 | NSP5 | hCoV-19/USA/WA-UW297/2020 | A | 173 | V | 2 | 20200315 |
| EPI_ISL_483719 | NSP5 | hCoV-19/Israel/n14291/2020 | A | 173 | C | 1 | 20200405 |
| EPI_ISL_507007 | NSP5 | hCoV-19/Iran/IRVSH-01/2020 | G | 174 | V | 1 | 20200501 |
| EPI_ISL_483719 | NSP5 | hCoV-19/Israel/n14291/2020 | G | 174 | W | 1 | 20200405 |
| EPI_ISL_483719 | NSP5 | hCoV-19/Israel/n14291/2020 | T | 175 | H | 1 | 20200405 |
| EPI_ISL_528932 | NSP5 | hCoV-19/England/20226015704/2020 | D | 176 | T | 1 | 20200519 |
| EPI_ISL_483719 | NSP5 | hCoV-19/Israel/n14291/2020 | D | 176 | R | 1 | 20200405 |
| EPI_ISL_469128 | NSP5 | hCoV-19/Singapore/379/2020 | L | 177 | F | 1 | 20200417 |
| EPI_ISL_461173 | NSP5 | hCoV-19/Netherlands/NoordBrabant_138/2020 | E | 178 | G | 4 | 20200000 |
| EPI_ISL_495156 | NSP5 | hCoV-19/USA/CA-IGI-0135/2020 | E | 178 | D | 14 | 20200608 |
| EPI_ISL_483719 | NSP5 | hCoV-19/Israel/n14291/2020 | E | 178 | R | 1 | 20200405 |
| EPI_ISL_483719 | NSP5 | hCoV-19/Israel/n14291/2020 | G | 179 | R | 1 | 20200405 |
| EPI_ISL_419444 | NSP5 | hCoV-19/Wales/PHWC-246F5/2020 | N | 180 | D | 4 | 20200318 |
| EPI_ISL_507735 | NSP5 | hCoV-19/USA/MI-MDHHS-SC20946/2020 | N | 180 | T | 1 | 20200323 |
| EPI_ISL_450513 | NSP5 | hCoV-19/Lebanon/S6_766/2020 | F | 181 | L | 1 | 20200309 |
| EPI_ISL_459173 | NSP5 | hCoV-19/England/CAMB-1B11DD/2020 | Y | 182 | M | 1 | 20200507 |
| EPI_ISL_524436 | NSP5 | hCoV-19/USA/CA-SR-0851/2020 | G | 183 | A | 1 | 20200514 |
| EPI_ISL_492257 | NSP5 | hCoV-19/England/BRIS-1853337/2020 | G | 183 | V | 1 | 20200403 |
| EPI_ISL_561524 | NSP5 | hCoV-19/Australia/VIC9307/2020 | P | 184 | L | 25 | 20200000 |
| EPI_ISL_428450 | NSP5 | hCoV-19/Guangdong/20SF156/2020 | P | 184 | S | 44 | 20200122 |
| EPI_ISL_595788 | NSP5 | hCoV-19/England/QEUH-9FA0A6/2020 | P | 184 | H | 1 | 20200927 |
| EPI_ISL_438054 | NSP5 | hCoV-19/Austria/CeMM0220/2020 | V | 186 | F | 4 | 20200316 |
| EPI_ISL_497809 | NSP5 | hCoV-19/Hong Kong/HKU-200723-042/2020 | V | 186 | I | 1 | 20200701 |
| EPI_ISL_575174 | NSP5 | hCoV-19/USA/UT-UPHL-04851/2020 | V | 186 | A | 1 | 20200523 |
| EPI_ISL_427289 | NSP5 | hCoV-19/USA/OH-OSUP0014/2020 | D | 187 | G | 2 | 20200331 |
| EPI_ISL_577675 | NSP5 | hCoV-19/India/MH-NIV-212999/2020 | D | 187 | T | 1 | 20200915 |
| EPI_ISL_436648 | NSP5 | hCoV-19/USA/CA-CZB-1007/2020 | R | 188 | K | 10 | 20200402 |
| EPI_ISL_480420 | NSP5 | hCoV-19/Bangladesh/BCSIR-NILMRC-135/2020 | R | 188 | S | 2 | 20200618 |
| EPI_ISL_577675 | NSP5 | hCoV-19/India/MH-NIV-212999/2020 | R | 188 | A | 1 | 20200915 |
| EPI_ISL_492179 | NSP5 | hCoV-19/Australia/SAP415/2020 | Q | 189 | K | 4 | 20200313 |
| EPI_ISL_434720 | NSP5 | hCoV-19/USA/TX-HMH09/2020 | T | 190 | I | 25 | 20200315 |
| EPI_ISL_447537 | NSP5 | hCoV-19/India/GJ-GBRC78b/2020 | T | 190 | A | 1 | 20200505 |
| EPI_ISL_483334 | NSP5 | hCoV-19/USA/CA-ALSR-0754-IPL/2020 | A | 191 | T | 2 | 20200501 |
| EPI_ISL_561742 | NSP5 | hCoV-19/Australia/VIC9275/2020 | A | 191 | V | 307 | 20200000 |
| EPI_ISL_463893 | NSP5 | hCoV-19/Bosnia and Herzegovina/03_Tuzla/2020 | A | 191 | E | 1 | 20200525 |
| EPI_ISL_426832 | NSP5 | hCoV-19/Australia/VIC572/2020 | A | 193 | T | 20 | 20200325 |
| EPI_ISL_415610 | NSP5 | hCoV-19/USA/WA-UW45/2020 | A | 193 | V | 22 | 20200308 |
| EPI_ISL_460364 | NSP5 | hCoV-19/USA/MA-MGH-00136/2020 | A | 193 | S | 3 | 20200325 |
| EPI_ISL_466551 | NSP5 | hCoV-19/England/20166056104/2020 | A | 193 | G | 1 | 20200414 |
| EPI_ISL_434184 | NSP5 | hCoV-19/USA/WA-S424/2020 | A | 194 | V | 6 | 20200328 |
| EPI_ISL_493205 | NSP5 | hCoV-19/Taiwan/NCKUH-012/2020 | A | 194 | T | 5 | 20200328 |
| EPI_ISL_478278 | NSP5 | hCoV-19/England/EXET-135D73/2020 | A | 194 | P | 1 | 20200418 |
| EPI_ISL_562782 | NSP5 | hCoV-19/Australia/VIC10066/2020 | G | 195 | D | 1 | 20200821 |
| EPI_ISL_565138 | NSP5 | hCoV-19/Australia/VIC8673/2020 | G | 195 | S | 3 | 20200724 |
| EPI_ISL_478514 | NSP5 | hCoV-19/England/NORT-283A05/2020 | T | 196 | M | 22 | 20200000 |
| EPI_ISL_468203 | NSP5 | hCoV-19/Switzerland/AG-ETHZ-120002/2020 | T | 196 | A | 2 | 20200417 |
| EPI_ISL_565913 | NSP5 | hCoV-19/Spain/AN-IBV-98001998/2020 | D | 197 | G | 1 | 20200316 |
| EPI_ISL_480604 | NSP5 | hCoV-19/Australia/VIC1645/2020 | D | 197 | N | 1 | 20200508 |
| EPI_ISL_421515 | NSP5 | hCoV-19/Spain/VC-FISABIO-40/2020 | T | 198 | I | 8 | 20200307 |
| EPI_ISL_481003 | NSP5 | hCoV-19/Spain/CT-IBV-003734/2020 | T | 198 | A | 2 | 20200408 |
| EPI_ISL_565913 | NSP5 | hCoV-19/Spain/AN-IBV-98001998/2020 | T | 198 | H | 1 | 20200316 |
| EPI_ISL_538026 | NSP5 | hCoV-19/Spain/VC-IBV-98003090/2020 | T | 199 | I | 13 | 20200314 |
| EPI_ISL_565913 | NSP5 | hCoV-19/Spain/AN-IBV-98001998/2020 | T | 199 | N | 1 | 20200316 |
| EPI_ISL_565913 | NSP5 | hCoV-19/Spain/AN-IBV-98001998/2020 | I | 200 | Y | 1 | 20200316 |
| EPI_ISL_424129 | NSP5 | hCoV-19/England/20129167204/2020 | T | 201 | A | 3 | 20200320 |
| EPI_ISL_565913 | NSP5 | hCoV-19/Spain/AN-IBV-98001998/2020 | T | 201 | Y | 1 | 20200316 |
| EPI_ISL_565913 | NSP5 | hCoV-19/Spain/AN-IBV-98001998/2020 | V | 202 | S | 1 | 20200316 |
| EPI_ISL_437536 | NSP5 | hCoV-19/India/WB-S1/2020 | V | 204 | A | 7 | 20200319 |
| EPI_ISL_492257 | NSP5 | hCoV-19/England/BRIS-1853337/2020 | L | 205 | F | 1 | 20200403 |
| EPI_ISL_584635 | NSP5 | hCoV-19/England/LOND-124DA6E/2020 | A | 206 | S | 2 | 20200000 |
| EPI_ISL_437613 | NSP5 | hCoV-19/Thailand/SI202872-NT/2020 | A | 206 | P | 1 | 20200225 |
| EPI_ISL_492257 | NSP5 | hCoV-19/England/BRIS-1853337/2020 | W | 207 | L | 1 | 20200403 |
| EPI_ISL_492257 | NSP5 | hCoV-19/England/BRIS-1853337/2020 | L | 208 | V | 1 | 20200403 |
| EPI_ISL_455749 | NSP5 | hCoV-19/India/OR-RMRC103/2020 | Y | 209 | H | 2 | 20200506 |
| EPI_ISL_492257 | NSP5 | hCoV-19/England/BRIS-1853337/2020 | Y | 209 | V | 1 | 20200403 |
| EPI_ISL_492257 | NSP5 | hCoV-19/England/BRIS-1853337/2020 | A | 210 | R | 1 | 20200403 |
| EPI_ISL_541683 | NSP5 | hCoV-19/India/MH-NIV-10435/2020 | A | 211 | V | 1 | 20200416 |
| EPI_ISL_492257 | NSP5 | hCoV-19/England/BRIS-1853337/2020 | A | 211 | C | 1 | 20200403 |
| EPI_ISL_577852 | NSP5 | hCoV-19/Netherlands/NH-EMC-56/2020 | V | 212 | F | 403 | 20200000 |
| EPI_ISL_541683 | NSP5 | hCoV-19/India/MH-NIV-10435/2020 | V | 212 | I | 17 | 20200416 |
| EPI_ISL_492257 | NSP5 | hCoV-19/England/BRIS-1853337/2020 | V | 212 | C | 1 | 20200403 |
| EPI_ISL_517261 | NSP5 | hCoV-19/England/LIVE-A90EB/2020 | I | 213 | T | 4 | 20200325 |
| EPI_ISL_456063 | NSP5 | hCoV-19/USA/NY-NYUMC827/2020 | I | 213 | V | 7 | 20200326 |
| EPI_ISL_492257 | NSP5 | hCoV-19/England/BRIS-1853337/2020 | I | 213 | Y | 1 | 20200403 |
| EPI_ISL_511940 | NSP5 | hCoV-19/India/MH-GA97/2020 | N | 214 | I | 1 | 20200617 |
| EPI_ISL_492257 | NSP5 | hCoV-19/England/BRIS-1853337/2020 | N | 214 | K | 1 | 20200403 |
| EPI_ISL_457820 | NSP5 | hCoV-19/USA/MD-HP00132/2020 | G | 215 | R | 3 | 20200316 |
| EPI_ISL_492257 | NSP5 | hCoV-19/England/BRIS-1853337/2020 | G | 215 | W | 1 | 20200403 |
| EPI_ISL_454167 | NSP5 | hCoV-19/Portugal/PT0443/2020 | D | 216 | N | 8 | 20200323 |
| EPI_ISL_579981 | NSP5 | hCoV-19/England/ALDP-9EA294/2020 | D | 216 | H | 1 | 20200924 |
| EPI_ISL_443325 | NSP5 | hCoV-19/England/CAMB-83CD4/2020 | D | 216 | Y | 1 | 20200415 |
| EPI_ISL_550021 | NSP5 | hCoV-19/England/MILK-9A854E/2020 | D | 216 | G | 1 | 20200902 |
| EPI_ISL_492257 | NSP5 | hCoV-19/England/BRIS-1853337/2020 | D | 216 | R | 1 | 20200403 |
| EPI_ISL_413696 | NSP5 | hCoV-19/China/WF0009/2020 | R | 217 | K | 2 | 20200100 |
| EPI_ISL_423428 | NSP5 | hCoV-19/England/20142012304/2020 | R | 217 | M | 11 | 20200330 |
| EPI_ISL_543674 | NSP5 | hCoV-19/USA/TX-HMH-4504/2020 | R | 217 | S | 3 | 20200619 |
| EPI_ISL_510845 | NSP5 | hCoV-19/Sweden/20-51765/2020 | R | 217 | G | 1 | 20200527 |
| EPI_ISL_492257 | NSP5 | hCoV-19/England/BRIS-1853337/2020 | R | 217 | Q | 1 | 20200403 |
| EPI_ISL_589525 | NSP5 | hCoV-19/England/ALDP-9EE0F0/2020 | W | 218 | C | 1 | 20200506 |
| EPI_ISL_454818 | NSP5 | hCoV-19/USA/NC_200318/2020 | L | 220 | F | 65 | 20200300 |
| EPI_ISL_492257 | NSP5 | hCoV-19/England/BRIS-1853337/2020 | L | 220 | V | 1 | 20200403 |
| EPI_ISL_567158 | NSP5 | hCoV-19/England/QEUH-9C8E2F/2020 | N | 221 | H | 1 | 20200911 |
| EPI_ISL_490809 | NSP5 | hCoV-19/Wales/PHWC-165E86/2020 | N | 221 | S | 1 | 20200619 |
| EPI_ISL_492257 | NSP5 | hCoV-19/England/BRIS-1853337/2020 | N | 221 | V | 1 | 20200403 |
| EPI_ISL_571508 | NSP5 | hCoV-19/USA/CA-QDX-817/2020 | R | 222 | Q | 6 | 20200323 |
| EPI_ISL_600461 | NSP5 | hCoV-19/Bangladesh/G-115/2020 | R | 222 | V | 1 | 20200620 |
| EPI_ISL_510183 | NSP5 | hCoV-19/Spain/MD-IBV-005299/2020 | R | 222 | L | 1 | 20200315 |
| EPI_ISL_492257 | NSP5 | hCoV-19/England/BRIS-1853337/2020 | R | 222 | S | 1 | 20200403 |
| EPI_ISL_494245 | NSP5 | hCoV-19/Wales/PHWC-168481/2020 | F | 223 | S | 3 | 20200419 |
| EPI_ISL_515838 | NSP5 | hCoV-19/South Africa/KRISP-K001353/2020 | F | 223 | I | 2 | 20200701 |
| EPI_ISL_592671 | NSP5 | hCoV-19/Australia/VIC15645/2020 | F | 223 | R | 4 | 20200731 |
| EPI_ISL_465657 | NSP5 | hCoV-19/England/20206026604/2020 | F | 223 | L | 1 | 20200511 |
| EPI_ISL_492257 | NSP5 | hCoV-19/England/BRIS-1853337/2020 | F | 223 | Q | 1 | 20200403 |
| EPI_ISL_527760 | NSP5 | hCoV-19/Costa Rica/INC-0092/2020 | T | 224 | A | 21 | 20200611 |
| EPI_ISL_535988 | NSP5 | hCoV-19/Canada/QC-LSPQ-L00232511/2020 | T | 224 | I | 3 | 20200322 |
| EPI_ISL_508176 | NSP5 | hCoV-19/India/UT-AR29/2020 | T | 224 | N | 2 | 20200526 |
| EPI_ISL_492257 | NSP5 | hCoV-19/England/BRIS-1853337/2020 | T | 224 | S | 1 | 20200403 |
| EPI_ISL_516822 | NSP5 | hCoV-19/Singapore/822/2020 | T | 225 | S | 2 | 20200707 |
| EPI_ISL_414624 | NSP5 | hCoV-19/France/NOR-N1620/2020 | T | 225 | I | 9 | 20200226 |
| EPI_ISL_600461 | NSP5 | hCoV-19/Bangladesh/G-115/2020 | T | 225 | N | 1 | 20200620 |
| EPI_ISL_472639 | NSP5 | hCoV-19/Wales/PHWC-15CF07/2020 | T | 225 | A | 2 | 20200406 |
| EPI_ISL_598513 | NSP5 | hCoV-19/England/MILK-A47FE8/2020 | T | 226 | N | 1 | 20201006 |
| EPI_ISL_495164 | NSP5 | hCoV-19/India/TG-CCMB-L1822-ONT/2020 | T | 226 | P | 1 | 20200602 |
| EPI_ISL_492257 | NSP5 | hCoV-19/England/BRIS-1853337/2020 | T | 226 | Y | 1 | 20200403 |
| EPI_ISL_459193 | NSP5 | hCoV-19/England/CAMB-1B1146/2020 | L | 227 | F | 31 | 20200505 |
| EPI_ISL_511954 | NSP5 | hCoV-19/India/KA-IB78/2020 | L | 227 | R | 1 | 20200620 |
| EPI_ISL_492257 | NSP5 | hCoV-19/England/BRIS-1853337/2020 | L | 227 | H | 1 | 20200403 |
| EPI_ISL_555779 | NSP5 | hCoV-19/England/ALDP-94F7BC/2020 | N | 228 | S | 3 | 20200616 |
| EPI_ISL_511954 | NSP5 | hCoV-19/India/KA-IB78/2020 | N | 228 | T | 2 | 20200620 |
| EPI_ISL_468160 | NSP5 | hCoV-19/Pakistan/NIH-45143/2020 | N | 228 | K | 1 | 20200602 |
| EPI_ISL_492257 | NSP5 | hCoV-19/England/BRIS-1853337/2020 | D | 229 | S | 1 | 20200403 |
| EPI_ISL_434553 | NSP5 | hCoV-19/Puerto Rico/CDC-S19/2020 | F | 230 | C | 1 | 20200401 |
| EPI_ISL_421506 | NSP5 | hCoV-19/France/IDF-3236/2020 | L | 232 | F | 10 | 20200321 |
| EPI_ISL_568146 | NSP5 | hCoV-19/England/ALDP-9BE23F/2020 | L | 232 | I | 1 | 20200909 |
| EPI_ISL_549196 | NSP5 | hCoV-19/USA/FL-BPHL-1414/2020 | V | 233 | M | 10 | 20200806 |
| EPI_ISL_575885 | NSP5 | hCoV-19/Wales/MILK-973184/2020 | V | 233 | A | 2 | 20200820 |
| EPI_ISL_585128 | NSP5 | hCoV-19/Northern Ireland/NIRE-10724E/2020 | V | 233 | L | 1 | 20200330 |
| EPI_ISL_542279 | NSP5 | hCoV-19/Italy/LOM-UniMI-L334/2020 | A | 234 | V | 108 | 20200303 |
| EPI_ISL_500692 | NSP5 | hCoV-19/Australia/NSW2253/2020 | A | 234 | T | 10 | 20200322 |
| EPI_ISL_494579 | NSP5 | hCoV-19/USA/CA-ALSR-1390/2020 | M | 235 | I | 11 | 20200507 |
| EPI_ISL_433998 | NSP5 | hCoV-19/England/CAMB-7C139/2020 | K | 236 | R | 37 | 20200000 |
| EPI_ISL_466347 | NSP5 | hCoV-19/England/201580028/2020 | K | 236 | E | 1 | 20200408 |
| EPI_ISL_462435 | NSP5 | hCoV-19/Serbia/KV22-05/2020 | K | 236 | N | 1 | 20200510 |
| EPI_ISL_489136 | NSP5 | hCoV-19/England/NORT-29265A/2020 | Y | 237 | C | 1 | 20200512 |
| EPI_ISL_417182 | NSP5 | hCoV-19/Hong Kong/HKPU20_3001/2020 | Y | 237 | F | 2 | 20200205 |
| EPI_ISL_539538 | NSP5 | hCoV-19/Spain/CT-ISCIII-2012571/2020 | N | 238 | D | 1 | 20200520 |
| EPI_ISL_433307 | NSP5 | hCoV-19/Scotland/CVR507/2020 | Y | 239 | C | 13 | 20200324 |
| EPI_ISL_547877 | NSP5 | hCoV-19/India/TG-NIV-906/2020 | E | 240 | D | 1 | 20200000 |
| EPI_ISL_479780 | NSP5 | hCoV-19/England/NP4/2020 | P | 241 | L | 40 | 20200000 |
| EPI_ISL_483548 | NSP5 | hCoV-19/Bahrein/BAH-07/2020 | P | 241 | S | 11 | 20200314 |
| EPI_ISL_511110 | NSP5 | hCoV-19/Portugal/PT0851/2020 | P | 241 | H | 14 | 20200327 |
| EPI_ISL_478546 | NSP5 | hCoV-19/England/NORT-284406/2020 | P | 241 | T | 4 | 20200320 |
| EPI_ISL_506999 | NSP5 | hCoV-19/Malaysia/5760/2020 | L | 242 | Q | 1 | 20200326 |
| EPI_ISL_449118 | NSP5 | hCoV-19/England/NORW-E81A1/2020 | T | 243 | A | 3 | 20200408 |
| EPI_ISL_512153 | NSP5 | hCoV-19/USA/AK-PHL588/2020 | T | 243 | I | 2 | 20200623 |
| EPI_ISL_441432 | NSP5 | hCoV-19/Northern Ireland/NIRE-FB4C0/2020 | Q | 244 | R | 7 | 20200317 |
| EPI_ISL_529860 | NSP5 | hCoV-19/USA/MI-MDHHS-SC21742/2020 | D | 245 | G | 1 | 20200729 |
| EPI_ISL_452561 | NSP5 | hCoV-19/Spain/AN-IBV-001209/2020 | D | 245 | Y | 2 | 20200324 |
| EPI_ISL_435059 | NSP5 | hCoV-19/South Africa/R05475/2020 | D | 245 | V | 1 | 20200320 |
| EPI_ISL_547590 | NSP5 | hCoV-19/India/HR-IMT-CB44/2020 | H | 246 | D | 2 | 20200827 |
| EPI_ISL_488682 | NSP5 | hCoV-19/England/NORT-28206E/2020 | H | 246 | Y | 35 | 20200324 |
| EPI_ISL_506999 | NSP5 | hCoV-19/Malaysia/5760/2020 | H | 246 | Q | 1 | 20200326 |
| EPI_ISL_468389 | NSP5 | hCoV-19/USA/CA-CZB-1414/2020 | V | 247 | F | 82 | 20200316 |
| EPI_ISL_466021 | NSP5 | hCoV-19/England/20146007604/2020 | V | 247 | I | 8 | 20200331 |
| EPI_ISL_480231 | NSP5 | hCoV-19/Turkey/GLAB-CoV007/2020 | V | 247 | A | 1 | 20200413 |
| EPI_ISL_440092 | NSP5 | hCoV-19/England/BRIS-121D10/2020 | D | 248 | E | 742 | 20200319 |
| EPI_ISL_557534 | NSP5 | hCoV-19/England/MILK-869832/2020 | D | 248 | A | 1 | 20200713 |
| EPI_ISL_475587 | NSP5 | hCoV-19/USA/CA-CSMC111/2020 | D | 248 | Y | 1 | 20200402 |
| EPI_ISL_451493 | NSP5 | hCoV-19/Australia/NSW227/2020 | I | 249 | T | 5 | 20200328 |
| EPI_ISL_539811 | NSP5 | hCoV-19/Hong Kong/VM20060398/2020 | I | 249 | V | 1 | 20200719 |
| EPI_ISL_548464 | NSP5 | hCoV-19/USA/CA-CZB-3733/2020 | L | 250 | I | 4 | 20200721 |
| EPI_ISL_511654 | NSP5 | hCoV-19/Portugal/PT1107/2020 | G | 251 | R | 7 | 20200327 |
| EPI_ISL_553712 | NSP5 | hCoV-19/Wales/ALDP-90E2A9/2020 | P | 252 | T | 1 | 20200622 |
| EPI_ISL_506955 | NSP5 | hCoV-19/South Korea/KCDC2161/2020 | P | 252 | S | 2 | 20200306 |
| EPI_ISL_597126 | NSP5 | hCoV-19/England/CAMC-A59323/2020 | L | 253 | F | 1 | 20201007 |
| EPI_ISL_548142 | NSP5 | hCoV-19/New Zealand/20VR3852/2020 | S | 254 | F | 102 | 20200000 |
| EPI_ISL_547877 | NSP5 | hCoV-19/India/TG-NIV-906/2020 | S | 254 | C | 1 | 20200000 |
| EPI_ISL_448765 | NSP5 | hCoV-19/England/OXON-AEBB8/2020 | A | 255 | V | 55 | 20200000 |
| EPI_ISL_481206 | NSP5 | hCoV-19/Norway/2477/2020 | A | 255 | S | 1 | 20200427 |
| EPI_ISL_547877 | NSP5 | hCoV-19/India/TG-NIV-906/2020 | A | 255 | G | 1 | 20200000 |
| EPI_ISL_452471 | NSP5 | hCoV-19/Spain/AN-IBV-001874/2020 | T | 257 | I | 3 | 20200306 |
| EPI_ISL_490647 | NSP5 | hCoV-19/Scotland/CVR1996/2020 | T | 257 | A | 1 | 20200409 |
| EPI_ISL_422919 | NSP5 | hCoV-19/Netherlands/ZuidHolland_48/2020 | I | 259 | T | 4 | 20200319 |
| EPI_ISL_514950 | NSP5 | hCoV-19/South Korea/KCDC2547/2020 | I | 259 | V | 5 | 20200621 |
| EPI_ISL_548733 | NSP5 | hCoV-19/Canada/ON-PHL-20-00056/2020 | A | 260 | V | 190 | 20200000 |
| EPI_ISL_500931 | NSP5 | hCoV-19/Switzerland/BE-ETHZ-190073/2020 | A | 260 | S | 1 | 20200704 |
| EPI_ISL_510198 | NSP5 | hCoV-19/Spain/MD-IBV-005319/2020 | A | 260 | T | 3 | 20200317 |
| EPI_ISL_425498 | NSP5 | hCoV-19/England/NOTT-10E0F2/2020 | V | 261 | A | 4 | 20200319 |
| EPI_ISL_568922 | NSP5 | hCoV-19/France/PAC-IHU-0670/2020 | V | 261 | I | 10 | 20200316 |
| EPI_ISL_576492 | NSP5 | hCoV-19/USA/UN-UW-527/2020 | V | 261 | F | 2 | 20200311 |
| EPI_ISL_488841 | NSP5 | hCoV-19/England/HECH-259A176/2020 | L | 262 | V | 1 | 20200518 |
| EPI_ISL_578375 | NSP5 | hCoV-19/USA/WI-WSLH-200148/2020 | D | 263 | Y | 3 | 20200313 |
| EPI_ISL_583495 | NSP5 | hCoV-19/Brazil/SP-345/2020 | D | 263 | N | 1 | 20200613 |
| EPI_ISL_583643 | NSP5 | hCoV-19/Austria/CeMM0683/2020 | D | 263 | A | 3 | 20200419 |
| EPI_ISL_469193 | NSP5 | hCoV-19/USA/CT-Yale-268/2020 | D | 263 | G | 3 | 20200402 |
| EPI_ISL_488841 | NSP5 | hCoV-19/England/HECH-259A176/2020 | D | 263 | R | 1 | 20200518 |
| EPI_ISL_427184 | NSP5 | hCoV-19/USA/WA-UW-3829/2020 | M | 264 | I | 5 | 20200325 |
| EPI_ISL_483721 | NSP5 | hCoV-19/Israel/n14274/2020 | M | 264 | V | 18 | 20200320 |
| EPI_ISL_478287 | NSP5 | hCoV-19/England/EXET-136501/2020 | M | 264 | L | 1 | 20200404 |
| EPI_ISL_488841 | NSP5 | hCoV-19/England/HECH-259A176/2020 | M | 264 | C | 1 | 20200518 |
| EPI_ISL_448656 | NSP5 | hCoV-19/England/OXON-AE022/2020 | A | 266 | V | 198 | 20200000 |
| EPI_ISL_471942 | NSP5 | hCoV-19/England/EXET-136FD6/2020 | A | 266 | P | 1 | 20200421 |
| EPI_ISL_488841 | NSP5 | hCoV-19/England/HECH-259A176/2020 | A | 266 | Y | 1 | 20200518 |
| EPI_ISL_511581 | NSP5 | hCoV-19/Portugal/PT1034/2020 | S | 267 | L | 14 | 20200326 |
| EPI_ISL_488841 | NSP5 | hCoV-19/England/HECH-259A176/2020 | S | 267 | K | 1 | 20200518 |
| EPI_ISL_488841 | NSP5 | hCoV-19/England/HECH-259A176/2020 | L | 268 | W | 1 | 20200518 |
| EPI_ISL_488841 | NSP5 | hCoV-19/England/HECH-259A176/2020 | K | 269 | R | 1 | 20200518 |
| EPI_ISL_459173 | NSP5 | hCoV-19/England/CAMB-1B11DD/2020 | E | 270 | D | 2 | 20200507 |
| EPI_ISL_488841 | NSP5 | hCoV-19/England/HECH-259A176/2020 | E | 270 | Q | 1 | 20200518 |
| EPI_ISL_492747 | NSP5 | hCoV-19/England/LOND-D88CD/2020 | E | 270 | G | 1 | 20200423 |
| EPI_ISL_488841 | NSP5 | hCoV-19/England/HECH-259A176/2020 | L | 271 | V | 1 | 20200518 |
| EPI_ISL_488841 | NSP5 | hCoV-19/England/HECH-259A176/2020 | L | 272 | V | 1 | 20200518 |
| EPI_ISL_476760 | NSP5 | hCoV-19/USA/MN-MDH-1175/2020 | Q | 273 | P | 1 | 20200521 |
| EPI_ISL_459173 | NSP5 | hCoV-19/England/CAMB-1B11DD/2020 | Q | 273 | L | 1 | 20200507 |
| EPI_ISL_488841 | NSP5 | hCoV-19/England/HECH-259A176/2020 | Q | 273 | S | 1 | 20200518 |
| EPI_ISL_499905 | NSP5 | hCoV-19/England/CAMB-1B578C/2020 | Q | 273 | K | 1 | 20200716 |
| EPI_ISL_418390 | NSP5 | hCoV-19/Finland/13M33/2020 | N | 274 | D | 67 | 20200313 |
| EPI_ISL_439100 | NSP5 | hCoV-19/Scotland/CVR748/2020 | N | 274 | S | 4 | 20200326 |
| EPI_ISL_459173 | NSP5 | hCoV-19/England/CAMB-1B11DD/2020 | N | 274 | T | 1 | 20200507 |
| EPI_ISL_433275 | NSP5 | hCoV-19/Scotland/CVR229/2020 | N | 274 | W | 1 | 20200319 |
| EPI_ISL_488841 | NSP5 | hCoV-19/England/HECH-259A176/2020 | N | 274 | Q | 1 | 20200518 |
| EPI_ISL_534772 | NSP5 | hCoV-19/England/OXON-B27EA/2020 | G | 275 | S | 6 | 20200414 |
| EPI_ISL_433275 | NSP5 | hCoV-19/Scotland/CVR229/2020 | G | 275 | Y | 1 | 20200319 |
| EPI_ISL_408483 | NSP5 | hCoV-19/Shanghai/IVDC-SH-001/2020 | G | 275 | A | 1 | 20200120 |
| EPI_ISL_486078 | NSP5 | hCoV-19/USA/WA-UW-3012/2020 | M | 276 | T | 4 | 20200327 |
| EPI_ISL_423704 | NSP5 | hCoV-19/England/20132001104/2020 | M | 276 | V | 16 | 20200323 |
| EPI_ISL_457652 | NSP5 | hCoV-19/England/SHEF-CC3DA/2020 | M | 276 | I | 4 | 20200424 |
| EPI_ISL_479761 | NSP5 | hCoV-19/USA/FL-04-UMTL-97QX/2020 | M | 276 | L | 2 | 20200408 |
| EPI_ISL_459173 | NSP5 | hCoV-19/England/CAMB-1B11DD/2020 | M | 276 | K | 1 | 20200507 |
| EPI_ISL_433275 | NSP5 | hCoV-19/Scotland/CVR229/2020 | M | 276 | E | 1 | 20200319 |
| EPI_ISL_490223 | NSP5 | hCoV-19/USA/CA-QRTP-Donor21/2020 | M | 276 | R | 1 | 20200401 |
| EPI_ISL_555141 | NSP5 | hCoV-19/England/ALDP-9504DF/2020 | N | 277 | S | 1 | 20200616 |
| EPI_ISL_594616 | NSP5 | hCoV-19/England/BIRM-66080/2020 | N | 277 | H | 1 | 20201007 |
| EPI_ISL_466551 | NSP5 | hCoV-19/England/20166056104/2020 | N | 277 | K | 1 | 20200414 |
| EPI_ISL_567809 | NSP5 | hCoV-19/England/ALDP-9C5323/2020 | N | 277 | D | 3 | 20200910 |
| EPI_ISL_479761 | NSP5 | hCoV-19/USA/FL-04-UMTL-97QX/2020 | N | 277 | R | 1 | 20200408 |
| EPI_ISL_488841 | NSP5 | hCoV-19/England/HECH-259A176/2020 | N | 277 | Y | 2 | 20200518 |
| EPI_ISL_459173 | NSP5 | hCoV-19/England/CAMB-1B11DD/2020 | N | 277 | Q | 1 | 20200507 |
| EPI_ISL_433275 | NSP5 | hCoV-19/Scotland/CVR229/2020 | N | 277 | W | 1 | 20200319 |
| EPI_ISL_490223 | NSP5 | hCoV-19/USA/CA-QRTP-Donor21/2020 | N | 277 | C | 1 | 20200401 |
| EPI_ISL_424003 | NSP5 | hCoV-19/England/20129017104/2020 | G | 278 | R | 232 | 20200320 |
| EPI_ISL_576078 | NSP5 | hCoV-19/Scotland/QEUH-9C9B63/2020 | G | 278 | E | 10 | 20200914 |
| EPI_ISL_479761 | NSP5 | hCoV-19/USA/FL-04-UMTL-97QX/2020 | G | 278 | C | 1 | 20200408 |
| EPI_ISL_459173 | NSP5 | hCoV-19/England/CAMB-1B11DD/2020 | G | 278 | H | 2 | 20200507 |
| EPI_ISL_433275 | NSP5 | hCoV-19/Scotland/CVR229/2020 | G | 278 | T | 1 | 20200319 |
| EPI_ISL_571675 | NSP5 | hCoV-19/USA/NY-QDX-869/2020 | R | 279 | C | 35 | 20200316 |
| EPI_ISL_432065 | NSP5 | hCoV-19/Wales/PHWC-288EC/2020 | R | 279 | H | 3 | 20200331 |
| EPI_ISL_433275 | NSP5 | hCoV-19/Scotland/CVR229/2020 | R | 279 | Y | 2 | 20200319 |
| EPI_ISL_459173 | NSP5 | hCoV-19/England/CAMB-1B11DD/2020 | R | 279 | K | 1 | 20200507 |
| EPI_ISL_488841 | NSP5 | hCoV-19/England/HECH-259A176/2020 | R | 279 | N | 1 | 20200518 |
| EPI_ISL_476126 | NSP5 | hCoV-19/Switzerland/ZH-ETHZ-140083/2020 | T | 280 | I | 7 | 20200421 |
| EPI_ISL_562119 | NSP5 | hCoV-19/Australia/VIC8126/2020 | T | 280 | A | 1 | 20200806 |
| EPI_ISL_479761 | NSP5 | hCoV-19/USA/FL-04-UMTL-97QX/2020 | T | 280 | F | 1 | 20200408 |
| EPI_ISL_459173 | NSP5 | hCoV-19/England/CAMB-1B11DD/2020 | T | 280 | Q | 1 | 20200507 |
| EPI_ISL_433275 | NSP5 | hCoV-19/Scotland/CVR229/2020 | T | 280 | H | 1 | 20200319 |
| EPI_ISL_488841 | NSP5 | hCoV-19/England/HECH-259A176/2020 | T | 280 | S | 1 | 20200518 |
| EPI_ISL_440327 | NSP5 | hCoV-19/England/CAMB-74122/2020 | I | 281 | V | 2 | 20200320 |
| EPI_ISL_479761 | NSP5 | hCoV-19/USA/FL-04-UMTL-97QX/2020 | I | 281 | P | 1 | 20200408 |
| EPI_ISL_459173 | NSP5 | hCoV-19/England/CAMB-1B11DD/2020 | I | 281 | L | 1 | 20200507 |
| EPI_ISL_428362 | NSP5 | hCoV-19/France/IDF-3709/2020 | I | 281 | M | 1 | 20200325 |
| EPI_ISL_516906 | NSP5 | hCoV-19/Israel/CVL1198/2020 | L | 282 | F | 1 | 20200628 |
| EPI_ISL_459173 | NSP5 | hCoV-19/England/CAMB-1B11DD/2020 | L | 282 | V | 1 | 20200507 |
| EPI_ISL_433275 | NSP5 | hCoV-19/Scotland/CVR229/2020 | L | 282 | G | 1 | 20200319 |
| EPI_ISL_463084 | NSP5 | hCoV-19/India/OR-ILSCV21602/2020 | L | 282 | S | 1 | 20200516 |
| EPI_ISL_545178 | NSP5 | hCoV-19/USA/TX-HMH-2201/2020 | G | 283 | D | 62 | 20200523 |
| EPI_ISL_566075 | NSP5 | hCoV-19/England/202260184/2020 | G | 283 | S | 1 | 20200526 |
| EPI_ISL_413696 | NSP5 | hCoV-19/China/WF0009/2020 | G | 283 | R | 2 | 20200100 |
| EPI_ISL_497625 | NSP5 | hCoV-19/USA/WA-S2197/2020 | S | 284 | C | 1 | 20200608 |
| EPI_ISL_526836 | NSP5 | hCoV-19/USA/VA-DCLS-0659/2020 | S | 284 | G | 20 | 20200410 |
| EPI_ISL_454645 | NSP5 | hCoV-19/USA/CT-CDC-8001/2020 | S | 284 | I | 1 | 20200421 |
| EPI_ISL_436442 | NSP5 | hCoV-19/India/MH-NCDC-3950/2020 | S | 284 | N | 5 | 20200409 |
| EPI_ISL_468412 | NSP5 | hCoV-19/USA/CA-CZB-1446/2020 | S | 284 | T | 2 | 20200330 |
| EPI_ISL_460070 | NSP5 | hCoV-19/USA/MN-MDH-87/2020 | A | 285 | V | 47 | 20200318 |
| EPI_ISL_508331 | NSP5 | hCoV-19/India/KA-IB54/2020 | A | 285 | P | 1 | 20200620 |
| EPI_ISL_541170 | NSP5 | hCoV-19/USA/FL-BPHL-1263/2020 | A | 285 | T | 1 | 20200604 |
| EPI_ISL_459173 | NSP5 | hCoV-19/England/CAMB-1B11DD/2020 | A | 285 | Q | 1 | 20200507 |
| EPI_ISL_478287 | NSP5 | hCoV-19/England/EXET-136501/2020 | A | 285 | F | 1 | 20200404 |
| EPI_ISL_471245 | NSP5 | hCoV-19/USA/WI-WSLH-200081/2020 | E | 288 | D | 2 | 20200410 |
| EPI_ISL_459173 | NSP5 | hCoV-19/England/CAMB-1B11DD/2020 | E | 288 | Q | 1 | 20200507 |
| EPI_ISL_478287 | NSP5 | hCoV-19/England/EXET-136501/2020 | E | 288 | K | 1 | 20200404 |
| EPI_ISL_557335 | NSP5 | hCoV-19/England/MILK-826752/2020 | E | 288 | G | 1 | 20200716 |
| EPI_ISL_419429 | NSP5 | hCoV-19/Wales/PHWC-2459E/2020 | D | 289 | A | 1 | 20200317 |
| EPI_ISL_478287 | NSP5 | hCoV-19/England/EXET-136501/2020 | D | 289 | L | 2 | 20200404 |
| EPI_ISL_511344 | NSP5 | hCoV-19/Portugal/PT1385/2020 | E | 290 | D | 1 | 20200327 |
| EPI_ISL_459173 | NSP5 | hCoV-19/England/CAMB-1B11DD/2020 | E | 290 | M | 1 | 20200507 |
| EPI_ISL_478287 | NSP5 | hCoV-19/England/EXET-136501/2020 | F | 291 | L | 1 | 20200404 |
| EPI_ISL_490223 | NSP5 | hCoV-19/USA/CA-QRTP-Donor21/2020 | F | 291 | Y | 1 | 20200401 |
| EPI_ISL_490223 | NSP5 | hCoV-19/USA/CA-QRTP-Donor21/2020 | T | 292 | F | 1 | 20200401 |
| EPI_ISL_517025 | NSP5 | hCoV-19/England/LIVE-A7478/2020 | P | 293 | S | 13 | 20200328 |
| EPI_ISL_563819 | NSP5 | hCoV-19/Australia/VIC13738/2020 | P | 293 | T | 3 | 20200826 |
| EPI_ISL_468262 | NSP5 | hCoV-19/Switzerland/VD-ETHZ-120187/2020 | P | 293 | L | 1 | 20200427 |
| EPI_ISL_414934 | NSP5 | hCoV-19/Shandong/LY001-2/2020 | F | 294 | I | 1 | 20200121 |
| EPI_ISL_489402 | NSP5 | hCoV-19/England/CAMB-1AC9FB/2020 | V | 296 | A | 2 | 20200423 |
| EPI_ISL_524883 | NSP5 | hCoV-19/USA/MD-MDH-0156/2020 | V | 297 | F | 1 | 20200713 |
| EPI_ISL_602272 | NSP5 | hCoV-19/USA/MD-MDH-0249/2020 | V | 297 | I | 1 | 20201003 |
| EPI_ISL_575269 | NSP5 | hCoV-19/USA/UT-UPHL-03214/2020 | R | 298 | K | 52 | 20200506 |
| EPI_ISL_455637 | NSP5 | hCoV-19/South Africa/KRISP-107/2020 | Q | 299 | R | 1 | 20200504 |
| EPI_ISL_454539 | NSP5 | hCoV-19/India/MH-NIV-5815-1/2020 | Q | 299 | H | 1 | 20200412 |
| EPI_ISL_433973 | NSP5 | hCoV-19/England/CAMB-7B54D/2020 | C | 300 | S | 2 | 20200000 |
| EPI_ISL_461031 | NSP5 | hCoV-19/Netherlands/Limburg_43/2020 | S | 301 | L | 16 | 20200320 |
| EPI_ISL_531574 | NSP5 | hCoV-19/England/QEUH-96A77F/2020 | S | 301 | T | 2 | 20200812 |
| EPI_ISL_440915 | NSP5 | hCoV-19/England/LIVE-9BD7C/2020 | S | 301 | P | 2 | 20200419 |
| EPI_ISL_424164 | NSP5 | hCoV-19/England/20129177704/2020 | G | 302 | C | 6 | 20200322 |
| EPI_ISL_455323 | NSP5 | hCoV-19/Spain/AN-ISCIII-201636/2020 | V | 303 | G | 1 | 20200306 |
| EPI_ISL_578162 | NSP5 | hCoV-19/USA/MI-UM-10033981968/2020 | V | 303 | I | 1 | 20200421 |
| EPI_ISL_437837 | NSP5 | hCoV-19/USA/ID-UW-6472/2020 | T | 304 | I | 18 | 20200402 |
| EPI_ISL_414934 | NSP5 | hCoV-19/Shandong/LY001-2/2020 | T | 304 | P | 1 | 20200121 |
| EPI_ISL_520171 | NSP5 | hCoV-19/Australia/VIC5408/2020 | F | 305 | L | 1 | 20200708 |
| EPI_ISL_534983 | NSP5 | hCoV-19/England/OXON-B492E/2020 | Q | 306 | H | 2 | 20200323 |
